1 **The transferable resistome of produce**

2 Khald Blau<sup>a</sup>, Antje Bettermann<sup>a</sup>, Sven Jechalke<sup>b</sup>, Eva Fornefeld<sup>c</sup>, Yann Vanrobaeys<sup>d,e</sup>,

3 Thibault Stalder<sup>d,e</sup>, Eva Top<sup>d,e</sup>, Kornelia Smalla<sup>a#</sup>

4

5 <sup>a</sup>Julius Kühn-Institut, Federal Research Centre for Cultivated Plants, Messeweg 11-12,

6 38104 Braunschweig, Germany

7 <sup>b</sup>Justus Liebig University Giessen, Institute for Phytopathology, Heinrich-Buff-Ring 26-

8 32 (IFZ), 35392 Gießen, Germany

9 <sup>c</sup>Julius Kühn-Institut, Federal Research Centre for Cultivated Plants, Stahnsdorfer

10 Damm 81, 14532 Kleinmachnow, Germany

11 <sup>d</sup>Department of Biological Sciences, University of Idaho, Moscow, Idaho, USA

12 <sup>e</sup>Institute for Bioinformatics and Evolutionary Studies, University of Idaho, Moscow,

13 Idaho, USA

14

15 Key words: *Escherichia coli*, antibiotic resistance, real-time PCR, IncF, IncI, horizontal

16 gene transfer

17

18 Running title: Transferable resistome associated with produce

19

20 #Address correspondence to Kornelia.Smalla@julius-kuehn.de.

21

22

23

24

25 **ABSTRACT**

26 Produce is increasingly recognized as a reservoir of human pathogens and transferable  
27 antibiotic resistance genes. This study aimed to explore methods to characterize the  
28 transferable resistome of bacteria associated with produce. Mixed salad, arugula, and  
29 cilantro purchased from supermarkets were analyzed by means of cultivation- and DNA-  
30 based methods. Before and after a nonselective enrichment step, tetracycline (tet)  
31 resistant *Escherichia coli* were isolated and plasmids conferring tet resistance were  
32 captured by exogenous plasmid isolation. Tet resistant *E. coli* isolates, transconjugants  
33 and total community (TC)-DNA from the microbial fraction detached from leaves or after  
34 enrichment were analyzed for the presence of resistance genes, class 1 integrons and  
35 various plasmids by real-time PCR and PCR-Southern blot hybridization. Real-time  
36 PCR primers were developed for IncI and IncF plasmids. Tet resistant *E. coli* isolated  
37 from arugula and cilantro carried IncF, IncI1, IncN, IncHI1, IncU and IncX1 plasmids.  
38 Three isolates from cilantro were positive for IncN plasmids and *bla*<sub>CTX-M-1</sub>. From mixed  
39 salad and cilantro, IncF, IncI1, and IncP-1 $\beta$  plasmids were captured exogenously.  
40 Importantly, whereas direct detection of IncI and IncF plasmids in TC-DNA failed, these  
41 plasmids became detectable in DNA extracted from enrichment cultures. This confirms  
42 that cultivation-independent DNA-based methods are not always sufficiently sensitive to  
43 detect the transferable resistome in the rare microbiome. In summary, this study  
44 showed that an impressive diversity of self-transmissible multiple resistance plasmids  
45 was detected in bacteria associated with produce that is consumed raw, and exogenous  
46 capturing into *E. coli* suggests that they could transfer to gut bacteria as well.

47

48 **IMPORTANCE**

49 Produce is one of the most popular food commodities. Unfortunately, leafy greens can  
50 be a reservoir of transferable antibiotic resistance genes. We found that IncF and IncI  
51 plasmids were the most prevalent plasmid types in *E. coli* isolates from produce. This  
52 study highlights the importance of the rare microbiome associated with produce as a  
53 source of antibiotic resistance genes that might escape cultivation-independent  
54 detection, yet may be transferred to human pathogens or commensals.

55

56

57

58

59

60

61

62

63

64

65

66

67

68

69

70

## 71 INTRODUCTION

72 Despite its benefit to human health, consumption of produce is increasingly recognized  
73 as a source of pathogenic bacteria, antibiotic-resistant bacteria (ARB) and antibiotic  
74 resistance genes (ARGs) associated with mobile genetic elements (MGEs) (1–5).  
75 Recently, several food-borne disease outbreaks have been associated with produce  
76 contamination world-wide (5–9). The microbiome of produce is important for plant health  
77 and vigor and was shown to be highly dynamic during growth, post-harvest, and  
78 processing (10), but can also contain potentially pathogenic bacteria from human and  
79 animals sources, including *E. coli* strains (11). Contamination can occur pre-harvest  
80 (i.e., through organic fertilizers, soil, wild animals or contaminated irrigation water) and  
81 post-harvest during processing (12, 13).

82 Antibiotic resistance in bacterial pathogens has increased globally due to the  
83 widespread use and misuse of antibiotics (14–17). Antibiotic resistance levels in *E. coli*  
84 are useful indicators of overall resistance levels of bacteria on foods, in animals, and  
85 humans (11). Antibiotic resistance and ARGs have been documented for enteric  
86 bacteria from various produce, which could facilitate the dissemination of resistant  
87 bacteria to a wider community of people (1, 2, 4, 16, 18, 19). If ARGs are localized on  
88 MGEs such as plasmids or conjugative transposons they can be transferred horizontally  
89 to pathogens (20). Horizontal gene transfer (HGT) takes place at sites with high cell  
90 densities of plasmid donors and recipients, nutrient availability and selective pressure.  
91 The phytosphere, including the rhizosphere and the phyllosphere have been reported  
92 as hot spots of HGT (21). The plasmid-mediated resistome of produce bacteria might  
93 provide the enterobacteria with ARGs in the intestine under selective conditions.

94 Conjugative plasmids can often confer not only resistance towards multiple antibiotics  
95 but also towards heavy metal compounds or disinfectants making co-selection possible  
96 (22–25). Although plasmids belonging to the incompatibility groups IncF and IncI have a  
97 narrow host range (NHR), they are assumed to be important for the dissemination of  
98 ARGs in *E. coli* and other *Enterobacteriaceae* (26, 27). Most importantly, resistance and  
99 virulence-associated traits of *E. coli* isolates were almost exclusively found on IncF  
100 group plasmids (28, 29). However, no real time (RT-) PCR systems that allow the  
101 cultivation-independent detection and quantification of these plasmids in total  
102 community (TC)-DNA are available.

103 In this study, we employed a combination of culture-dependent and -independent  
104 approaches to assess the transferable resistome of bacteria associated with produce  
105 (see Figure 1). Tetracycline (tet) resistant *E. coli* were isolated from produce directly  
106 after purchase and after seven days of storage by selective plating with and without  
107 prior non-selective enrichment. In addition, we captured a set of transferable tet  
108 resistance plasmids into a *E. coli* recipient strains using the so-called exogenous  
109 plasmid isolation method (30). Tetracycline was chosen because of its wide use in  
110 animal husbandries resulting in a high load released via organic fertilizers into the agro-  
111 ecosystem (31). TC-DNA was also extracted from the microbial fraction detached from  
112 produce or after nonselective enrichment to detect and quantify the abundance of ARGs  
113 and MGEs. New RT-PCR primers were developed for the detection and quantification of  
114 IncF and IncI plasmids. Our study showed the presence of diverse transferable  
115 antibiotic resistance plasmids in the rare microbiome of produce, which would have  
116 likely been missed by exclusively using metagenomic approaches.

## 117 RESULTS

### 118 Phenotypic and genotypic characterization of tet resistant *E. coli* isolates

119 To determine if produce was a source of antibiotic resistant *E. coli*, we determined the  
120 occurrence and resistance profiles of tet resistant *E. coli* isolated from 24 samples of  
121 produce directly or after an overnight enrichment step. The characterization of a total of  
122 63 tet resistant *E. coli* isolates from cilantro (n=54), arugula (n=7) and mixed salad  
123 (n=2), of which 50 were recovered after nonselective enrichment and 13 without  
124 enrichment (20.6%) revealed an impressive diversity (Table 1).

125 Almost all *E. coli* isolates were resistant to antibiotics from at least one class, and two  
126 isolates were resistant to eight antibiotic classes: Tetracyclines (TE; D), penicillins  
127 (AM;AMX), 3<sup>rd</sup> generation cephalosporins (CTX; CRO), fluoroquinolones (CIP; OFX;  
128 NA), aminoglycosides (GM; S), sulfonamides (SD), phenicols (C), and trimethoprim  
129 (TMP). Most of the tet resistant *E. coli* displayed in addition resistance to ampicillin and  
130 amoxicillin (84%), followed by trimethoprim (73%). Resistances to ofloxacin,  
131 ciprofloxacin, sulfadiazine, and streptomycin were also common. We tested all the  
132 isolates for the production of extended-spectrum beta-lactamases (ESBLs) with the  
133 double-disc diffusion assay (DDT) and found three ESBL-producing *E. coli* which were  
134 isolated from two of the cilantro samples.

135 We then tested the genomic DNA from the collection of *E. coli* isolates for the presence  
136 of various resistance genes [*tet(A)*, *strA*, *sul1*, *sul2*, *sul3*, *aadA*, *qacE/qacEΔ1*,  
137 *merRTΔP*, *bla* genes (TEM, CTX-M, and SHV), *qnr* genes (*qnrA*, *qnrB*, and *qnrS*)], and  
138 integrase genes *intl1* and *intl2* by RT- or regular PCR (Table 1). The most commonly  
139 detected ARGs was the tetracycline resistance gene *tet(A)* in 59 out of 63 isolates. A

140 total of 10 isolates were positive for sulfonamide resistance genes *sul1*, 14 for *sul2* and  
141 five for *sul3*. The combination of *sul1-sul2*, *sul2-sul3*, and *sul1-sul3* were detected in  
142 seven, three and one isolates, respectively. All three *sul* genes were found in one tet  
143 resistant *E. coli* isolate from cilantro. *qnrB* and *qnrS* genes encoding fluoroquinolone  
144 resistance were detected alone or in combination in one and 38 isolates, respectively.  
145 The *bla*<sub>TEM</sub> genes encoding for the resistance to ampicillin and amoxicillin were detected  
146 in 82.5% of tet resistant *E. coli* isolates. The *bla*<sub>CTX-M-1</sub> gene encoding ESBL resistance  
147 was only detected in three isolates and was found in combination with *bla*<sub>TEM</sub> genes in  
148 two *E. coli* from cilantro. The *bla*<sub>SHV</sub> gene encoding ESBL resistance was not detected  
149 in any of the isolates. For streptomycin/spectinomycin resistance gene, *aadA* (24  
150 isolates) was most common, followed by *strA* (21 isolates) and *aadA-strA* (three  
151 isolates).

152 The class 1 integron integrase gene *intI1* was detected in 50 isolates, while the class 2  
153 integron integrase gene *intI2* was not detected at all. Although *qacE/qacEΔ1* encoding  
154 quaternary ammonium compound resistance is a typical component of class 1  
155 integrons, the gene was detected only in 23 isolates, suggesting a large proportion of  
156 atypical class 1 integrons. Interestingly, *merRTΔP* encoding for regulatory, transport,  
157 and extracellular mercury-binding genes was detected in 12 isolates. These findings  
158 show that produce can be a source of multidrug resistant *E. coli* isolates.

159

### 160 **Characterization of plasmids in tet resistant *E. coli* isolates**

161 To test if the tet resistant *E. coli* isolates recovered from produce harbor plasmids and to  
162 assign them to known plasmid groups, their genomic DNA was screened by TaqMan

163 probe-based RT-PCR systems for IncF and IncI plasmids and by PCR-based replicon  
164 typing (PBRT) (Table 1). All isolates that were positive by RT-PCR targeting the IncF  
165 (*traI* gene) were also identified by replicon typing as IncF confirming the specificity of  
166 the novel TaqMan RT-PCR system. However, PBRT allowed also the assignment to the  
167 different IncF subgroups. Furthermore, other plasmids were also identified by PBRT or  
168 RT-PCR (*korB*, specific for IncP-1 plasmids) or PCR (IncN). A summary of the  
169 plasmid/replicon types detected among the 63 representative tet resistant *E. coli*  
170 isolates is given in Table 1. For cilantro and arugula, almost all tet resistant *E. coli*  
171 isolates contained plasmids [61 out of 63], but the plasmids detected in the two isolates  
172 from mixed salad could not be assigned using the RT-PCR or PBRT. In most isolates  
173 (n=45) one plasmid type was detected, but some had two (n=15) or three (n=1)  
174 plasmids. Plasmids from seven different Inc groups were found in the 63 *E. coli* isolates:  
175 IncFII (n=21), IncI1 (n=17), IncX1 (n=11), IncFIB (n=10), IncU (n=6), IncN (n=4), and  
176 IncHI1 (n=2). All Inc groups were found in *E. coli* isolates from cilantro, whereas arugula  
177 resulted in only two groups [IncI1 (n=5) and IncFII (n=2)]. Plasmids of the IncF groups  
178 (FII and FIB) were the predominant types, followed by IncI1 and IncX1 plasmids. The  
179 combination of replicon types IncFII and IncFIB was detected in two isolates, whereas  
180 the combination of replicon types IncFII-IncI1 and IncFIB-IncI1 was found in six and five  
181 isolates, respectively. In one isolate from cilantro the combination IncFII-IncFIB-IncI1  
182 was detected. IncI2 plasmids were not detected in any of *E. coli* isolates.

183

## 184 **Conjugal transfer of antibiotic resistance**



185 Conjugation experiments were conducted in order to determine the potential transfer of  
186 antibiotic resistances to other bacteria. Conjugal transfer experiments were performed  
187 using tet resistant *E. coli* isolates positive for ESBL (EK2.29, EK3.43, and EK3.44) as  
188 donors and kanamycin and rifampicin resistant *E. coli* CV601 as a recipient at 37°C. We  
189 selected transconjugants on LB plates containing tetracycline and cefotaxime, which  
190 corresponded to phenotypes of the donors. The transfer of the resistance phenotypes  
191 was successful.

192

### 193 **Phenotypic and genotypic characterization of plasmids captured via exogenous** 194 **isolation**

195 We further investigated the presence of transferable plasmids in produce by capturing  
196 tet resistance plasmids from nonselective enrichment culture of fresh leaves from  
197 cilantro, mixed salad, and arugula by exogenous plasmid isolation into *E. coli* CV601.  
198 Tet resistant transconjugants were only captured on day 0 but not on day 7. The  
199 transfer frequencies of tet resistant transconjugants were  $1.73 \times 10^{-7}$ ,  $1.55 \times 10^{-4}$  and  
200  $4.66 \times 10^{-9}$  per recipient in cilantro, mixed salad, and arugula, respectively. While all  
201 transconjugants obtained from cilantro (n=27) and arugula (n=23) were characterized,  
202 from mixed salad only a total of 41 transconjugants was analyzed due to the high  
203 number of transconjugants obtained. Based on an initial phenotypic and genotypic  
204 analyses, 15 representative out of 91 tet resistant transconjugants from produce  
205 (cilantro, n=12; arugula, n=1; mixed salad, n=2) were selected for further  
206 characterization. The majority of these transconjugants acquired resistance to at least  
207 two antibiotic classes, and all were resistant to tetracycline, ampicillin and amoxicillin.

208 The *bla*<sub>TEM</sub> genes encoding for ampicillin and amoxicillin resistances were detected in  
209 86.7% of tet resistant transconjugants (Table 2). The tetracycline resistance gene *tet*(A)  
210 was found in 13 out of 15 transconjugants from cilantro and arugula but not from mixed  
211 salad, while *tet*(Q) was only detected in one plasmid (pBMS1) isolated from the mixed  
212 salad. Four tetracycline resistance plasmids (pBC1.1, pBC1.3, pBC1.9, and pBC1.12)  
213 captured from cilantro carried the insertion sequence *IS1071* and class 1 integrons  
214 (*intl1*), tetracycline resistance gene *tet*(A), but encoded also resistance to ampicillin  
215 (*bla*<sub>TEM</sub>), and mercury compounds (*merRTΔP*). Eight plasmids from cilantro  
216 transconjugants (pBC2.1, pBC2.2, pBC2.3, pBC2.4, pBC2.6, pBC2.8, pBC2.11, and  
217 pBC2.15) carried *tet*(A), *qnrS*, and *bla*<sub>TEM</sub> and two of them (pBC2.1 and pBC2.4) carried  
218 in addition *sul1* and *sul2*, respectively. Two tet resistance plasmids (pBMS1 and  
219 pBMS4) captured from mixed salad carried *sul1*, *strA*, *merRTΔP*, *bla*<sub>TEM</sub>, and *intl1*. One  
220 plasmid (pBA1) captured from arugula carried *bla*<sub>TEM</sub> and *tet*(A) (Table 2). Thus this  
221 approach demonstrates that transferable multidrug resistance plasmids were easily  
222 captured by *E. coli* CV601, a process that might also occur in the human gut.

223

#### 224 **Identification of exogenously isolated plasmids**

225 The newly developed TaqMan probe-based RT-PCR assay was used to screen the tet  
226 resistant transconjugants for the presence of IncF and IncI plasmids and validated by  
227 PBRT. In addition, other plasmids were also identified by RT-PCR (*korB*, specific for  
228 IncP-1 plasmids) and Southern blot hybridization. Plasmids of known Inc groups were  
229 detected in all transconjugants from the mixed salad and cilantro but not in the  
230 transconjugants from arugula. Representative transconjugants from cilantro and mixed

231 salad carried either one (n=11) or two (n=3) replicons. In 12 transconjugants from  
232 cilantro samples four different plasmid replicon types were detected (Table 2): IncFII  
233 (n=3); IncFIB (n=6); IncI1 (n=2); and IncP-1 $\beta$  (n=4). In contrast, the transconjugants  
234 isolated from mixed salad showed only one replicon type, IncFII (n=2) . One plasmid  
235 that could not be assigned by PBRT or RT-PCR was isolated from arugula leaves. The  
236 combination of replicon types IncFII and IncP-1 $\beta$  was detected in two transconjugants  
237 (pBC1.9 and pBC1.12), while the combination of replicon types of plasmids IncFIB and  
238 IncI1 was found in one transconjugant (pBC2.3) captured from cilantro leaves. Southern  
239 blot hybridization for sequences specific for IncP-1 plasmids revealed that four plasmids  
240 belonged to the IncP-1 $\beta$  subgroup. IncI2 plasmids were not detected in any tet resistant  
241 transconjugants (Table 2). In contrast to IncFIB/FII and IncI1 plasmids, the IncP-1 $\beta$   
242 plasmids captured exogenously were not detected in the 63 tet resistant *E. coli* isolates.

243

#### 244 **Detection of IncF and IncI plasmids, *tet(A)*, and *intl1* in total community DNA**

245 We also screened for plasmids (IncF, IncI1 and, IncI2), tetracycline resistance genes  
246 *tet(A)* and integrase gene *intl1* in TC-DNA extracted from bacterial communities either  
247 directly after their detachment from fresh leaves or after an enrichment step, using  
248 PCR-Southern blot hybridization and RT-PCR (Table 3). Using the RT-PCR method,  
249 IncF and IncI plasmids as well as *tet(A)* gene were detected in TC-DNA extracted from  
250 enrichment cultures of leaves, but not in TC-DNA from the detached bacteria. In  
251 contrast, the *intl1* gene was detected in both kinds of TC-DNA. Consistent with these  
252 results, PCR-Southern blot hybridization targeting the IncF and IncI plasmids and *tet(A)*  
253 revealed strong hybridization signals in TC-DNA extracted from the enrichment cultures,

254 but very weak or no signals from direct extractions.

255

256

257

258

259

260

261

262

263

264

265

266

267

268

269

270

271

272

273

274

275

276

## 277 DISCUSSION

278 The present study showed that bacteria associated with produce can carry various  
279 plasmids that might serve as link between the environmental and the human gut  
280 microbiome. Although initially low in abundance, tet resistant *E. coli* were isolated from  
281 all produce samples purchased after none selective enrichment. Contamination of  
282 produce with *E. coli* strains can occur in the field by contaminated soil (organic  
283 fertilizers), exposure to contaminated irrigation water or post harvest (12, 13). In this  
284 study, tet resistant *E. coli* isolates were mostly isolated from cilantro that was purchased  
285 in four Asian supermarkets in two cities, followed by mixed ready to eat salad and  
286 arugula. This might be a hint that produce imported from Asia might be a hotspot for  
287 contamination with *E. coli* carrying multidrug resistance plasmids. A high proportion of  
288 the tet resistant *E. coli* isolates was also resistant to penicillins (AM and AMX) followed  
289 by trimethoprim. Although it is difficult to compare among studies because of different  
290 methodologies used for isolation and resistance testing, our results are in line with high  
291 resistance levels to penicillins and trimethoprim previously reported for *E. coli* from  
292 irrigation water and vegetables (18), ready to eat salads (1), and lettuce (2). In the  
293 present study, tet resistance was commonly conferred by *tet(A)*, partly confirming  
294 previous studies reporting *tet(A)* and *tet(B)* genes as the most common tet resistance  
295 genes in *E. coli* and *Salmonella spp.* isolated from ready to eat vegetables (1, 32). The  
296 rapid dissemination of tetracycline resistance among bacteria has been related to the  
297 occurrence of *tet* resistance genes on transposons and conjugative plasmids (22, 23,  
298 33), but also to the selective pressure, e.g. the use of antibiotics in animal husbandries  
299 and the spread of tet resistance genes via organic fertilizers (31).

300 Plasmid-mediated multidrug resistance plays an important role in the transfer of ARGs  
301 around the world (34). Our study showed that *E. coli* isolates from produce harbored  
302 various plasmids belonging to replicon types IncF, IncI1, IncX1, IncU, IncN, and IncHI1,  
303 with IncF plasmids being the most frequently detected. IncF plasmids were found  
304 predominantly in *E. coli* isolated from drinking water (35) and poultry farms (36). In our  
305 study IncFII was the most frequently detected (36.5%) replicon type, followed by IncFIB  
306 (15.9%), which is in line with studies on *E. coli* recovered from pigs and human (37),  
307 wastewater (38), and animals (39). The combination of replicon types IncFII and IncFIB  
308 in two isolates is consistent with a report on *Enterobacter cloacae* from lettuce (3).  
309 However, we cannot exclude that these replicons are located on the same plasmid, as  
310 several studies have reported the combination of replicon types as a multi-replicon on a  
311 single plasmid (40–42), likely due to co-integration (28). In this study, tet resistant *E. coli*  
312 isolates which carried IncF plasmids were positive also for *tet(A)*, *aadA*, *sul1*, *sul2*, *sul3*,  
313 *qacE/qacEΔ1*, *qnrB*, *qnrS* or *bla<sub>TEM</sub>* genes. Previous reports found that IncF plasmids  
314 can carry genes conferring resistance to all major antibiotic classes including  
315 aminoglycosides, β-lactams, phenicols, tetracyclines, sulfonamides, and  
316 fluoroquinolones (37, 39, 43).

317 The NHR IncI1 plasmid types were the second most dominant replicon type (34.9%)  
318 and IncI1 positive isolates also carried multiple ARGs. In this study, strains carrying  
319 IncI1 plasmids were also positive for class 1 integron integrase gene *intI1* and a diverse  
320 set of resistance genes, namely *tet(A)*, *sul2*, *strA*, *bla<sub>TEM</sub>*, *qacE/qacEΔ1*, *aadA*, *sul3*,  
321 *qnrS*, and *merRTΔP*. In a recent study, IncI1 plasmids from irrigation water and lettuce  
322 carried genes *sul1*, *tet(A)*, *aadA*, *strA*, and *bla<sub>TEM</sub>* as well as *intI1* (18). Similar

323 phenotype and genotype profiles among *E. coli* strains from the current study and those  
324 recovered in previous studies from clinical samples, the environment or other foods  
325 indicate that produce may play a potential role in the dispersal of *E. coli* carrying  
326 plasmid-localized ARGs. Thus, plasmids belonging to the IncF and IncI groups have the  
327 potential to be a major contributor worldwide to the propagation of ARGs within enteric  
328 bacteria. One dissemination route of enteric bacteria carrying IncF and IncI plasmids  
329 might be the consumption of produce.

330 The newly developed TaqMan probe-based RT-PCR assays demonstrated high  
331 specificity in detecting these plasmids in *E. coli* isolates and PCR positives were also  
332 assigned by PBRT which in addition enables sub-typing.

333 This is the first study identifying NHR plasmids such as IncX1 and IncHI1 and broad-  
334 host-range (BHR) plasmid IncU in *E. coli* isolates recovered from cilantro leaves.  
335 Interestingly, IncX plasmids were detected in *E. cloacae* from lettuce (3). IncHI1  
336 plasmids were previously reported in *E. coli* and *Citrobacter youngae* isolates from  
337 water and healthy calves, respectively (44), while the first IncU plasmids were isolated  
338 from *Aeromonas salmonicida* (45), and later from *Aeromonas caviae* from hospital  
339 effluent in the UK (46). In general, a low prevalence of ESBL-producing *E. coli* was  
340 found on produce, which is similar to previous studies (19, 47, 48). In the present study,  
341 the occurrence of ESBL-producing *E. coli* were only isolated from cilantro (2.8%).

342 To our knowledge, this is also the first report of *E. coli* isolates from cilantro that were  
343 positive for conjugative IncN plasmids, *bla*<sub>CTX-M-1</sub>, and resistance to 3<sup>rd</sup> generation  
344 cephalosporins. The *bla*<sub>CTX-M-1</sub> gene was also reported on plasmids belonging to the  
345 IncN family in *E. coli* from farm workers, animals, humans, and the environment (49–

346 51). Although IncN plasmids are able to replicate in a variety of *Enterobacteriaceae*,  
347 they are most frequently found in *E. coli* and *Klebsiella pneumoniae*, where they  
348 contribute to the dissemination of cephalosporin and carbapenem resistance (52).  
349 The results of the present study is investigation showed that *E. coli* isolates harboring  
350 the *bla*<sub>CTX-M-1</sub> gene also conferred resistance to at least seven classes of antibiotics  
351 tested. Moreover, *E. coli* harboring CTX-M genes were recently reported from lettuce  
352 and irrigation water (4, 53), raw vegetables (32, 53), and coastal waters (54, 55). Kim et  
353 al. reported that ESBL-producing *E. coli* and *Klebsiella pneumoniae* carrying CTX-M  
354 were detected in ready to eat vegetables (56). A recent study has detected *bla*<sub>TEM</sub>  
355 genes in association with IncF and IncI1 plasmids from irrigation water and lettuce (18).  
356 In previous reports, the occurrence of *sul1* and *qacE/qacEΔ1* was frequently associated  
357 with class 1 integrons (3, 57). Unexpectedly, only 27% and 36.5% of *sul1*- and  
358 *qacE/qacEΔ1*- positive isolates carried the *int11* gene, respectively, indicating that  
359 atypical class 1 integrons were more prevalent among the isolates as previously also  
360 reported by Amos et al. (58).  
361 In the present study, transferable tet resistance plasmids were also directly captured  
362 from the produce microbiomes on day 0 but not on day 7 after purchase, and the  
363 highest transfer frequency was observed in mixed salad, followed by cilantro and  
364 arugula. Differences in observed frequencies of transconjugants could be due to  
365 different abundance of bacteria with conjugative plasmids in the various sample types,  
366 or due to real differences in the frequencies of plasmid transfer. The latter might be  
367 affected by the metabolic activity of the produce microbiome, as plasmid transfer  
368 frequency is known to depend not only on plasmid-specific characteristics, but also



369 ecological factors affecting the metabolic activity of bacteria (59). Replicon types IncFII,  
370 IncFIB, IncI1, and IncP-1 $\beta$  were captured from cilantro leaves whereas only IncFII  
371 plasmids were captured from mixed salad. IncF (FII and FIB) plasmids were prevalent  
372 among tet resistant transconjugants from both produce. Most of the IncF plasmids  
373 exogenously captured harbored *bla*<sub>TEM</sub>, *tet(A)*, and *qnrS* genes. One IncI1 plasmid was  
374 captured from cilantro and another one in combination with replicon type IncFIB. The  
375 conjugative plasmids carried *tet(A)* and *bla*<sub>TEM</sub> genes. Finally, four IncP-1 $\beta$  plasmids  
376 were captured from cilantro leaves and two of them in combination with replicon type  
377 IncFII. IncP-1 plasmids have been frequently captured by exogenous plasmid isolation  
378 from various environments such as sewage sludge (60), manure (23), and water (61).  
379 However, the first isolations of IncP-1 plasmids were from clinical isolates (62, 63). The  
380 IncP-1 $\beta$  plasmids carried genes conferring resistances to antibiotics *tet(A)*, *strA*, and  
381 *bla*<sub>TEM</sub> but also mercury compounds (*merRT $\Delta$ P*) and disinfectants (*qacE/qacE $\Delta$ 1*).  
382 In conclusion, this study showed that produce that we eat might contain bacteria such  
383 as *E. coli* carrying transferable multidrug resistance plasmids. Although *E. coli* numbers  
384 are typically low, our nonselective enrichments showed that proliferation can easily  
385 occur. Our study reports a specific TaqMan probe-based RT-PCR assays that can be  
386 used for rapid detection of IncF and IncI plasmids in *E. coli* isolates and exogenously  
387 captured plasmids as well as in TC-DNA extracted from enrichment cultures of leaves.  
388 However, quantifying these plasmids in TC-DNA directly extracted from the microbial  
389 fraction detached from leaves was impossible due to their low abundance in the  
390 microbiome, but IncF and IncI plasmids were detected in DNA extracted after previous  
391 enrichment. While these assays represent an important and useful tool to be

392 implemented for monitoring the prevalence of IncF and IncI plasmids in isolates and the  
393 environment, negative results of these and other cultivation-independent methods can  
394 lead to an underestimation of the mobile resistome present in the rare microbiome of  
395 produce and other samples. This is the first study demonstrating that multi-drug  
396 resistance plasmids present in produce associated bacteria were transferable to  
397 sensitive *E. coli* recipients, a process that could occur in the human gut. The NHR  
398 plasmids IncF and IncI1 but also the BHR IncP-1 $\beta$  plasmids were captured from the  
399 produce. In particular the captured IncF and Inc1 plasmids conferred resistance towards  
400 several classes of antibiotics. Thus produce associated bacteria should be considered  
401 as important route of disseminating transferable antibiotic resistances which might be  
402 particularly relevant for patients under antibiotic treatment.

403

404

405

406

407

408

409

410

411

412

413

414

## 415 **MATERIALS AND METHODS**

### 416 **Sample collection**

417 A total of 24 samples from different produce (mixed salad, arugula, and cilantro)  
418 imported or locally produced was analyzed. The produce samples were purchased from  
419 different local supermarkets in Germany and collected in September-2016, June-2016  
420 and Mai-2017, respectively. They were stored at fridge temperature and sampled on  
421 days 0 and 7, four replicates for each time point and produce type.

422

### 423 **Isolation and identification of tet resistant *E. coli***

424 For sampling, the produce was cut into smaller pieces using a sterile scalpel and mixed.  
425 Of each sample 25 g were placed in two stomacher bags (one for direct plating and the  
426 other for enrichment) and mixed three times with 75 ml buffered peptone water (BPW,  
427 Roth; Karlsruhe, Germany), with subsequent stomacher treatment performed with the  
428 Stomacher® 400 (Seward Worthing, England) at high speed for 1 min. The enrichment  
429 cultures of fresh leaves in BPW were incubated at 37°C with shaking (150 rpm) for 18-  
430 24 h. In order to isolate tet resistant *E. coli*, appropriate dilutions of the sample  
431 suspensions and also of the enrichment cultures were plated on different culture media  
432 [Eosin Methylene Blue (EMB, Sifin; Berlin, Germany) and Chromocult coliform agar  
433 (CCA, Merck, Darmstadt, Germany)] supplemented with tetracycline (10 mg L<sup>-1</sup>). All  
434 plates were incubated at 37°C for 18-24 h. The presumptive *E. coli* colonies were picked  
435 from each sample and streaked onto EMB, CCA, and TBX chromogener Agar (TBX,  
436 Roth; Karlsruhe, Germany) for confirmation by colony morphology and further  
437 characterization. *E. coli* isolates were then confirmed by biochemical tests for indole

438 production, methyl red and catalase activity (64). Furthermore, isolates were analyzed  
439 for the presence of the *gadA* gene (Glutamate Decarboxylase Genes) specific for *E. coli*  
440 using PCR (65). *E. coli* isolates were stored in Luria broth (LB, Roth; Karlsruhe,  
441 Germany) containing 15% glycerol at -80°C.

442

### 443 **Exogenous plasmid isolation**

444 In order to capture tetracycline-resistance plasmids exogenous plasmid isolation via  
445 biparental mating was performed using [*Escherichia coli* CV601 *gfp*<sup>+</sup>, kanamycin (Km)  
446 and rifampicin (Rif) resistant; Heuer et al. (66)] as a recipient. The recipient strain was  
447 grown overnight in Tryptic Soy Broth (TSB; Merck, Darmstadt, Germany) supplemented  
448 with rifampicin (Rif) (50 mg L<sup>-1</sup>) and kanamycin (Km) (50 mg L<sup>-1</sup>). Two ml of the recipient  
449 strain culture was transferred into a sterile Eppendorf tube and centrifuged at 3,100 x *g*  
450 for 5 min and washed twice with 1:10 TSB. Then, the pellet was resuspended in 2 ml of  
451 1:10 TSB. The bacterial suspensions (donor) of each sample on days 0 and 7 were  
452 prepared from enrichment cultures of fresh leaves as described above. 0.5 ml of  
453 recipient strain and 20 ml of each enrichment culture (donor) were mixed in a 50 ml  
454 falcon tube. As a background control, 5 ml of the enrichment cultures and 200 µl of the  
455 recipient were processed the same way as the samples. All mixtures were centrifuged  
456 at 3,100 x *g* for 10 min. The pellets were resuspended in 200 µl of 1:10 TSB and then  
457 spotted onto a filter for mating (Millipore filters, 0.22µm). Filters were incubated  
458 overnight at 28°C on Plate count agar plates (PCA; Merck, Darmstadt, Germany)  
459 supplemented with cycloheximide (Cyc) (100 mg L<sup>-1</sup>). After incubation, the filters were  
460 placed in 2 ml of sterile 0.85% NaCl solution in a 50 ml falcon tube. Each filter was

461 washed by vortexing for 1 minute. Serial 10-fold dilutions were done and appropriate  
462 dilutions were plated on PCA agar supplemented with rifampicin (Rif 50 mg L<sup>-1</sup>),  
463 kanamycin (Km 50 mg L<sup>-1</sup>), cycloheximide (Cyc 100 mg L<sup>-1</sup>), and tetracycline (Tet 15 mg  
464 L<sup>-1</sup>) to select for tetracycline-resistant transconjugants. Background controls of bulk soil  
465 and the recipient controls were plated on the same selective media. Numbers of  
466 recipient cells were determined by applying three replicate 20 µl drops per each serial  
467 dilution (10<sup>-5</sup> to 10<sup>-8</sup>) of all mating mixes on PCA with km (50 mg L<sup>-1</sup>), rif (50 mg L<sup>-1</sup>), and  
468 cyc (100 mg L<sup>-1</sup>). All plates were incubated at 28°C for up to 3 days. Transconjugants  
469 were determined by green fluorescence resulting from the green fluorescence protein  
470 (GFP). The identity of putative transconjugants was confirmed by BOX-PCR (67).  
471 Transfer frequencies were calculated as total number of transconjugants divided by the  
472 total number of recipients.

473

#### 474 **Antibiotic susceptibility testing**

475 Antimicrobial susceptibility testing was performed by the disk diffusion method on  
476 Müller-Hinton agar (MH; SIGMA-ALDRICH CHEMIE GmbH, USA), according to the  
477 EUCAST (European Committee on Antimicrobial Susceptibility Testing). The antibiotics  
478 (µg) (BD, Bacton, Dickinson and Company, USA) used in this study were: amoxicillin  
479 (25), ampicillin (10), cefotaxime (30), ceftazidime (30), ceftriaxone (30), chloramphenicol  
480 (30), ciprofloxacin (5), colistin (10), tet (30), doxycycline (30), streptomycin (10),  
481 gentamicin (10), ofloxacin (5), kanamycin (30), nalidixic acid (30), trimethoprim (5),  
482 sulfadiazine (250). Tet resistant *E. coli* isolates were streaked onto LB agar  
483 supplemented with tet (10 mg L<sup>-1</sup>), while tet resistant *E. coli* CV601 transconjugants

484 were streaked on plate count agar plates (PCA, Merck, Darmstadt, Germany)  
485 supplemented with tet (15 mg L<sup>-1</sup>), km (50 mg L<sup>-1</sup>) and rif (50 mg L<sup>-1</sup>). *E. coli* CV601  
486 strain was used as a negative control. The bacterial suspension was prepared from a  
487 single colony in normal saline (0.85% NaCl) to a density of 0.5 McFarland turbidity  
488 standard. Cotton swabs were used for streaking the suspension onto MH agar plates.  
489 After air drying, antibiotic discs were placed on the plates. Then all plates were  
490 incubated at 37°C for 18-24 h. The inhibition zone was measured. The results were  
491 interpreted according to the guidelines of EUCAST. Clinical and Laboratory Standards  
492 Institute (CLSI) recommendations were used when antibiotic breakpoints in EUCAST  
493 guidelines were absent (i.e. doxycycline, streptomycin, tetracycline, and nalidixic acid).  
494 ESBL production was confirmed among tet resistant *E. coli* isolates and transconjugants  
495 by double-disc diffusion test (DDT) (47). The phenotypic confirmatory test was  
496 confirmed as ESBL producer according to the CLSI.

497

#### 498 **TC-DNA extraction**

499 The bacterial fraction detached from fresh leaves directly or after an enrichment culture  
500 of each sample as described above were pelleted by centrifugation at 3,100 x g for 15  
501 min at 4°C. Total community-DNA was extracted from the pellet using the  
502 FastDNA®SPIN Kit for soil (MP Biomedicals, Heidelberg, Germany), according to the  
503 manufacturer's instructions. The quality of extracted DNA was determined by agarose  
504 gel electrophoresis. The extracted DNA was stored at -20°C until further analysis.

505

#### 506 **Genomic DNA extraction**

507 Genomic DNA was extracted from overnight cultures of tet resistant *E. coli* isolates,  
508 transconjugants and the recipient strain with Qiagen genomic DNA extraction kit  
509 (Qiagen, Hilden, Germany) using a silica-based kit (silica bead DNA extraction kit;  
510 Thermo Scientific, St. Leon-Rot, Germany). The extracted genomic DNA was stored at -  
511 20°C until further analysis

512

### 513 **Primer-probe design (IncF, IncI1, and IncI2 plasmids)**

514 As it is known that relaxase genes can be used for classification of the mobilization  
515 systems of plasmids (68), the *tral* gene region was chosen as a target region to design  
516 primers detecting IncF, IncI1 and IncI2 plasmid sequences. A total of 4,530 plasmid  
517 DNA sequences were downloaded from NCBI (NCBI, Batch Entrez) using the 4,602  
518 plasmid accession numbers found in GenBank by Shintani et al. (69), among which 298  
519 plasmids were identified as MOBF. The CDS of the MOBF plasmids were aligned using  
520 tBLASTn against the relaxase Tral of the F plasmid (AP001918), resulting in 110 protein  
521 sequences sharing > 50% identity and >70% coverage. The 110 protein sequences  
522 closely related to Tral were aligned using MAFT multiple sequence alignment software  
523 version 1.3.3. The alignment produced was back translated using the EMBOSS  
524 Backtranseq tool and used to generate a set of degenerated primers and probes using  
525 Primer3. All those steps were carried out in Geneious® 8.1.9. At best, 83 of the 110 *tral*  
526 nucleic acid sequences could be targeted by one set of designed primers and probe  
527 (see Table 4). Those sequences belonged mostly to plasmids isolated from *Salmonella*  
528 *enterica* and *Escherichia coli* and few from *Klebsiella pneumoniae* and *Shigella* spp.  
529 The plasmids corresponded to a part of the subclade MOBF12 defined by Garcillán-

530 Barcia et al. (70), which is comprised of the phylogenetically broad IncF complex. When  
531 tested against the 4,530 plasmids the primers-probe targeted 92 plasmids in the  
532 database, 89 plasmids belonged to the MOBF group (298 plasmids recovered belonged  
533 to this group) and 3 were annotated as "non-mob" and belonged to any MOB group.  
534 When looking at the "Inc" classification, 73 of the targeted plasmids belonged to the  
535 IncF (including FI and FII), 14 IncZ and 5 to the pCD1 type. Among the 4,530 plasmid  
536 sequences 243 carried a *rep* gene belonging to the IncF group, indicating that the  
537 primer/probe cannot detect all possible IncF plasmids.

538 Available IncI plasmid sequences were downloaded from NCBI and the *tral* genes were  
539 aligned using the software CLC Main Workbench software version 8 (CLC bio, Qiagen®  
540 company) with standard settings for alignments and primers were designed to match  
541 conserved regions of the *tral* gene (see Table 4). The specificity was confirmed in silico  
542 with NCBI primer BLAST and with a set of plasmids from other incompatibility groups.  
543 Plasmids used for this test were R388, pB10, pHHV216, RSF1010, pSM1890, RP4,  
544 pHH3-414, pHH2-227, pRA3, RN3, RSF1010, pTH10, pTP6, R751, pQKH54, pKS208,  
545 pEST4002, pJKJ5, pMCFB1, pRMS149, pCAR1, pD2RT, pD67, pWW0 and pST527  
546 from which none was amplified.

547

#### 548 **Detection of IncF, IncI plasmids by real-time PCR**

549 The RT-PCR assay was performed under standard conditions, all qPCR reactions were  
550 set up in a 25 µL reaction volume using a Hot Start Taq DNA Polymerase (M0495L,  
551 New England BioLabs, Inc, UK) containing 5 µL of template DNA, 300 nM of primer  
552 (reverse), 50 nM of primer (forward), and 50 nM of probe for IncF, while 300 nM of each



553 primer (forward and reverse) and TaqMan probe for IncI. All Primers and probes are  
554 described in Table 4. The following PCR program was used for amplification: 10 min at  
555 95°C, followed by 40 cycles of 95°C for 30 sec and 60°C for 1 min. The assays were  
556 carried out in triplicate with real-time PCR 5'-nuclease assays (TaqMan qPCRRT-PCR)  
557 in a CFX96 real-time PCR detection system (Bio-Rad, Hercules, CA). Negative controls  
558 were included in all tests, and they consisted of all the elements of the reaction except  
559 for the template DNA.

560 Standard plasmids were used to construct a full standard curve in duplicate in each  
561 qPCR run. Standard plasmids were constructed by cloning the purified PCR products  
562 amplified from the plasmids R64 for IncI1, pHNSHP45 for IncI2, and IncF plasmids for  
563 the sub\_MOBF12 using the corresponding primer pairs used for the RT-PCR, into  
564 TransforMax™ EC100™ Electrocompetent *E. coli* (Epicentre), in pJET1.2 using the  
565 Thermo Scientific CloneJET PCR Cloning Kit (Thermo Scientific).

566

#### 567 **Detection of target genes by real-time qPCR and PCR**

568 The target genes in genomic DNA extracted from tet resistant *E. coli* isolates and  
569 transconjugants were detected by RT-PCR 5'-nuclease assays (TaqMan or EvaGreen  
570 RT-PCR) in a CFX96 RT-PCR detection system (Bio-Rad, Hercules, CA) or by PCR for  
571 class 1 and 2 integrons integrase genes [*intl1* and *intl2*], *korB* (IncP-1 plasmids),  
572 *qacE/qacEΔ1* encoding quaternary ammonium compound resistance, [*aadA* and *strA*]  
573 encoding streptomycin and spectinomycin resistance, tetracycline resistance genes  
574 [*tet(Q)* and, *tet(A)*], *merRTΔP* gene part of the mercury resistance operon, [*sul1*, *sul2*  
575 and *sul3*] encoding sulfonamide resistance, [*qnrA*, *qnrB*, *qnrS*] encoding fluoroginolone

576 resistance,  $\beta$ -lactam resistance genes [*bla*<sub>TEM</sub>, *bla*<sub>SHV</sub> and *bla*<sub>CTX-M-1</sub>], IncN (*rep*), and  
577 Insertion Sequence IS1071 (represented by *tnpA* gene). The DNA of the recipient strain  
578 *E. coli* CV601 was included as negative control. The primers and probes targeting these  
579 genes and PCR and qPCR conditions are listed in (Table 4).

580

### 581 **Conjugation assay**

582 Tet resistant *E. coli* isolates positive for ESBL (EK2.29, EK3.43, and EK3.44) were  
583 examined for their ability to transfer resistance. Briefly, the donors and the rifampicin  
584 and kanamycin resistant *E. coli* CV601 recipient strain were grown in LB broth overnight  
585 at 37°C. 500  $\mu$ l of overnight cultures of each donor and recipient strains were mixed in 1  
586 ml LB broth, and incubated at 37°C for 24 h without shaking. 100  $\mu$ l of the conjugal  
587 mixture was spread on LB agar (Roth; Karlsruhe, Germany) containing Rif (50 mg L<sup>-1</sup>),  
588 Kan (50 mg L<sup>-1</sup>), CTX (2 mg L<sup>-1</sup>), and Tet (15 mg L<sup>-1</sup>), and incubated at 37°C for 24-48  
589 h. The transconjugants were verified by BOX-PCR and further tested for the antibiotic  
590 resistance phenotypes and genotypes as described above.

591

### 592 **Plasmid DNA extraction and detection by Southern blot hybridization**

593 Plasmid DNA extraction from tet resistant transconjugants (pBC1.1, pBC1.3, pBC1.9,  
594 and pBC1.12) captured exogenously from the enrichment of cilantro leaves was  
595 performed using Qiagen Plasmid Mini Kit (Qiagen Inc., Hilden, Germany) according to  
596 the manufacturer's instructions. In order to detect the IncP-1 plasmids with Southern  
597 blot hybridization in these transconjugants, plasmid DNA was digested with the  
598 restriction enzyme *NotI* (Thermo Fisher Scientific, Waltham, MA, USA), and fragments

599 were separated by electrophoresis on a 1% agarose-TBE gel as described previously  
600 (71). Southern blot hybridization was performed with digoxigenin (DIG) labeled probes  
601 generated from PCR amplicons which were obtained from reference plasmids R751 for  
602 IncP1- $\beta$  as previously described by Binh et al. (72).

603

604

### 605 **Plasmid replicon typing**

606 PBRT was used to identify the incompatibility group of plasmids in tet resistant *E. coli*  
607 and transconjugants, and to confirm the presence of IncF and IncI plasmids as  
608 determined via the newly developed RT-PCR method as described above. This was  
609 done by PCR amplification on genomic DNA of the strains using primer sets for 30  
610 replicons: HI1, HI2, I1, I2, X1, X2, X3, X4, L, M, N, FIA, FIB, FIC, FII, FIIS, FIIK, FIB KN,  
611 FIB KQ, W, Y, P1, A/C, T, K, U, R, B/O, HIB-M, and FIB-M, representative of major  
612 plasmid incompatibility groups among Enterobacteriaceae (73, 28). PCR products were  
613 separated by electrophoresis on a 2.5% agarose-TBE gel and stained with ethidium  
614 bromide.

615

### 616 **Detection of IncF and IncI plasmids, *tet(A)* and class 1 integrase gene *intl1* via**

### 617 **PCR-Southern blot hybridization and RT-PCR in TC-DNA**

618 PCR-Southern blot hybridization or RT-PCR was used to detect *tet(A)*, *intl1*, IncF, and  
619 IncI plasmids in TC-DNA extracted from microbial fraction detached from leaves directly  
620 or after an enrichment step on days 0 and 7. The PCR products were separated on a  
621 1% agarose-TBE gel electrophoresis and then transferred to a positively charged nylon

622 membrane (GE Healthcare, UK). Southern blot hybridization was carried out with  
623 digoxigenin (DIG) labeled probes generated from PCR amplicons which were obtained  
624 from reference plasmids pKJK5 for *int11* and *tet(A)* as described by Dealtry et al. (74),  
625 and R64 for IncI1, pHNSHP45 for IncI2, and IncF plasmids. The primers and PCR  
626 conditions are listed in Table 4.

627

## 628 **ACKNOWLEDGMENTS**

629 The authors are thankful to Ute Zimmerling and Lena Rauch for their technical  
630 assistance. K.B. had a scholarship from the Libyan government, S.J. was funded by the  
631 German Environment Agency (Umweltbundesamt) (FKZ 3713 63402), and T.S. was  
632 funded by the United States Department of Agriculture (USDA) NIFA award # 2018-  
633 67017-27630.

634

635

636

637

638

639

640

641

642

643

644

645

## 646 REFERENCES

- 647 1. Campos J, Mourão J, Pestana N, Peixe L, Novais C, Antunes P. 2013. Microbiological quality of  
648 ready-to-eat salads. An underestimated vehicle of bacteria and clinically relevant antibiotic  
649 resistance genes. *Int J Food Microbiol* 166:464–470. doi:10.1016/j.ijfoodmicro.2013.08.005.
- 650 2. Holvoet K, Sampers I, Callens B, Dewulf J, Uyttendaele M. 2013. Moderate prevalence of  
651 antimicrobial resistance in *Escherichia coli* isolates from lettuce, irrigation water, and soil. *Appl*  
652 *Environ Microbiol* 79:6677–6683. doi:10.1128/AEM.01995-13.
- 653 3. Jones-Dias D, Manageiro V, Ferreira E, Barreiro P, Vieira L, Moura IB, Caniça M. 2016. Architecture  
654 of Class 1, 2, and 3 integrons from Gram negative bacteria recovered among fruits and vegetables.  
655 *Front Microbiol* 7:1400. doi:10.3389/fmicb.2016.01400.
- 656 4. Njage PMK, Buys EM. 2015. Pathogenic and commensal *Escherichia coli* from irrigation water show  
657 potential in transmission of extended spectrum and AmpC  $\beta$ -lactamases determinants to isolates  
658 from lettuce. *Microb Biotechnol* 8:462–473. doi:10.1111/1751-7915.12234.
- 659 5. Buchholz Udo, Bernard Helen, Werber Dirk, Böhmer Merle M., Remschmidt Cornelius, Wilking  
660 Hendrik, Deleré Yvonne, an der Heiden Matthias, Adlhoch Cornelia, Dreesman Johannes, Ehlers  
661 Joachim, Ethelberg Steen, Faber Mirko, Frank Christina, Fricke Gerd, Greiner Matthias, Höhle  
662 Michael, Ivarsson Sofie, Jark Uwe, Kirchner Markus, Koch Judith, Krause Gérard, Lubert Petra,  
663 Rosner Bettina, Stark Klaus, Kühne Michael. 2011. German outbreak of *Escherichia coli* O104:H4  
664 associated with sprouts. *N Engl J med* 365:1763–1770.
- 665 6. Callejón RM, Rodríguez-Naranjo MI, Ubeda C, Hornedo-Ortega R, Garcia-Parrilla MC, Troncoso AM.  
666 2015. Reported foodborne outbreaks due to fresh produce in the United States and European  
667 Union:Trends and causes. *Foodborne Pathog Dis* 12:32–38. doi:10.1089/fpd.2014.1821.
- 668 7. Herman KM, Hall AJ, Gould LH. 2015. Outbreaks attributed to fresh leafy vegetables, United States,  
669 1973-2012. *Epidemiol Infect* 143:3011–3021. doi:10.1017/S0950268815000047.
- 670 8. Wendel AM, Johnson DH, Sharapov U, Grant J, Archer JR, Monson T, Koschmann C, Davis JP. 2009.  
671 Multistate outbreak of *Escherichia coli* O157. H7 infection associated with consumption of  
672 packaged spinach, August-September 2006: the Wisconsin investigation. *Clin Infect Dis* 48:1079–  
673 1086. doi:10.1086/597399.
- 674 9. Friesema I, Sigmundsdottir G, van der Zwaluw K, Heuvelink A, Schimmer B, Jager C de, Rump B,  
675 Briem H, Hardardottir H, Atladottir A, Gudmundsdottir E, van Pelt W. 2008. An international  
676 outbreak of Shiga toxin-producing *Escherichia coli* O157 infection due to lettuce, September –  
677 October 2007. *Eurosurveillance* 13. doi:10.2807/ese.13.50.19065-en.
- 678 10. Berg G, Grube M, Schloter M, Smalla K. 2014. The plant microbiome and its importance for plant  
679 and human health. *Front Microbiol* 5:491. doi:10.3389/fmicb.2014.00491.
- 680 11. Sáenz Y, Zarazaga M, Briñas L, Lantero M, Ruiz-Larrea F, Torres C. 2001. Antibiotic resistance in  
681 *Escherichia coli* isolates obtained from animals, foods and humans in Spain. *Int J Antimicrob Agents*  
682 18:353–358. doi:10.1016/S0924-8579(01)00422-8.
- 683 12. Berger CN, Sodha SV, Shaw RK, Griffin PM, Pink D, Hand P, Frankel G. 2010. Fresh fruit and  
684 vegetables as vehicles for the transmission of human pathogens. *Environ Microbiol* 12:2385–2397.  
685 doi:10.1111/j.1462-2920.2010.02297.x.

- 686 13. Alegbeleye OO, Singleton I, Sant'Ana AS. 2018. Sources and contamination routes of microbial  
687 pathogens to fresh produce during field cultivation. A review. *Food Microbiol* 73:177–208.  
688 doi:10.1016/j.fm.2018.01.003.
- 689 14. Gustafson RH, Bowen RE. 1997. Antibiotic use in animal agriculture. *J Appl Microbiol* 83:531–541.  
690 doi:10.1046/j.1365-2672.1997.00280.x.
- 691 15. McManus PS, Stockwell VO, Sundin GW, Jones AL. 2002. Antibiotic use in plant agriculture. *Annu*  
692 *Rev Phytopathol* 40:443–465. doi:10.1146/annurev.phyto.40.120301.093927.
- 693 16. Chang Q, Wang W, Regev-Yochay G, Lipsitch M, Hanage WP. 2015. Antibiotics in agriculture and the  
694 risk to human health. How worried should we be? *Evol Appl* 8:240–247. doi:10.1111/eva.12185.
- 695 17. Grenni P, Ancona V, Barra Caracciolo A. 2018. Ecological effects of antibiotics on natural  
696 ecosystems. A review. *Microchemical J* 136:25–39. doi:10.1016/j.microc.2017.02.006.
- 697 18. Araújo S, A T Silva I, Tacão M, Patinha C, Alves A, Henriques I. 2017. Characterization of antibiotic  
698 resistant and pathogenic *Escherichia coli* in irrigation water and vegetables in household farms. *Int J*  
699 *Food Microbiol* 257:192–200. doi:10.1016/j.ijfoodmicro.2017.06.020.
- 700 19. Blaak H, van Hoek AHAM, Veenman C, van Docters Leeuwen AE, Lynch G, van Overbeek WM, Roda  
701 Husman AM de. 2014. Extended spectrum  $\beta$ -lactamase- and constitutively AmpC-producing  
702 Enterobacteriaceae on fresh produce and in the agricultural environment. *Int J Food Microbiol* 168-  
703 169:8–16. doi:10.1016/j.ijfoodmicro.2013.10.006.
- 704 20. Hudson JA, Frewer LJ, Jones G, Brereton PA, Whittingham MJ, Stewart G. 2017. The agri-food chain  
705 and antimicrobial resistance. A review. *Trends Food Sci Technol* 69:131–147.  
706 doi:10.1016/j.tifs.2017.09.007.
- 707 21. van Elsas JD, Turner S, Bailey MJ. 2003. Horizontal gene transfer in the phytosphere. *New Phytol*  
708 157:525–537. doi:10.1046/j.1469-8137.2003.00697.x.
- 709 22. Bennett PM. 2008. Plasmid encoded antibiotic resistance. Acquisition and transfer of antibiotic  
710 resistance genes in bacteria. *Br J Pharmacol* 153:S347-S357. doi:10.1038/sj.bjp.0707607.
- 711 23. Heuer H, Binh CTT, Jechalke S, Kopmann C, Zimmerling U, Krögerrecklenfort E, Ledger T, González  
712 B, Top E, Smalla K. 2012. IncP-1 $\epsilon$  plasmids are important vectors of antibiotic resistance genes in  
713 agricultural systems. Diversification driven by class 1 Integron gene cassettes. *Front Microbiol* 3:2.  
714 doi:10.3389/fmicb.2012.00002.
- 715 24. Verraes C, van Boxtael S, van Meervenne E, van Coillie E, Butaye P, Catry B, Schaetzen M-A de, van  
716 Huffel X, Imberechts H, Dierick K, Daube G, Saegerman C, Block J de, Dewulf J, Herman L. 2013.  
717 Antimicrobial resistance in the food chain. A review. *Int J Environ Res Public Health* 10:2643–2669.  
718 doi:10.3390/ijerph10072643.
- 719 25. Song J, Rensing C, Holm PE, Virta M, Brandt KK. 2017. Comparison of metals and tetracycline as  
720 selective agents for development of tetracycline resistant bacterial communities in agricultural soil.  
721 *Environ Sci Technol* 51:3040–3047. doi:10.1021/acs.est.6b05342.
- 722 26. Suzuki H, Yano H, Brown CJ, Top EM. 2010. Predicting plasmid promiscuity based on genomic  
723 signature. *J Bacteriol* 192:6045–6055. doi:10.1128/JB.00277-10.
- 724 27. Rozwandowicz M, Brouwer MSM, Fischer J, Wagenaar JA, Gonzalez-Zorn B, Guerra B, Mevius DJ,  
725 Hordijk J. 2018. Plasmids carrying antimicrobial resistance genes in Enterobacteriaceae. *J*  
726 *Antimicrob Chemother*. doi:10.1093/jac/dkx488.

- 727 28. Villa L, García-Fernández A, Fortini D, Carattoli A. 2010. Replicon sequence typing of IncF plasmids  
728 carrying virulence and resistance determinants. *J Antimicrob Chemother* 65:2518–2529.  
729 doi:10.1093/jac/dkq347.
- 730 29. Johnson TJ, Nolan LK. 2009. Pathogenomics of the virulence plasmids of *Escherichia coli*. *Microbiol*  
731 *Mol Biol Rev* 73:750–774. doi:10.1128/MMBR.00015-09.
- 732 30. Smalla K, Jechalke S, Top EM. 2015. Plasmid detection, characterization and ecology. *Microbiol*  
733 *Spectr* 3:10.1128/microbiolspec.PLAS-0038-2014. doi:10.1128/microbiolspec.PLAS-0038-2014.
- 734 31. Wolters B, Widyasari-Mehta A, Kreuzig R, Smalla K. 2016. Contaminations of organic fertilizers with  
735 antibiotic residues, resistance genes, and mobile genetic elements mirroring antibiotic use in  
736 livestock? *Appl Microbiol Biotechnol* 100:9343–9353. doi:10.1007/s00253-016-7742-y.
- 737 32. Skočková A, Karpíšková R, Koláčková I, Cupáková Š. 2013. Characteristics of *Escherichia coli* from  
738 raw vegetables at a retail market in the Czech Republic. *Int J Food Microbiol* 167:196–201.  
739 doi:10.1016/j.ijfoodmicro.2013.09.011.
- 740 33. Jones-Dias D, Manageiro V, Caniça M. 2016. Influence of agricultural practice on mobile bla genes.  
741 Incl1-bearing CTX-M, SHV, CMY and TEM in *Escherichia coli* from intensive farming soils. *Environ*  
742 *Microbiol* 18:260–272. doi:10.1111/1462-2920.13021.
- 743 34. Wang J, Stephan R, Karczmarczyk M, Yan Q, Hächler H, Fanning S. 2013. Molecular characterization  
744 of bla ESBL-harboring conjugative plasmids identified in multi-drug resistant *Escherichia coli*  
745 isolated from food-producing animals and healthy humans. *Front Microbiol* 4:188.  
746 doi:10.3389/fmicb.2013.00188.
- 747 35. Lyimo B, Buza J, Subbiah M, Temba S, Kipasika H, Smith W, Call DR. 2016. IncF plasmids are  
748 commonly carried by antibiotic resistant *Escherichia coli* isolated from drinking water sources in  
749 Northern Tanzania. *Int J Microbiol* 2016:3103672. doi:10.1155/2016/3103672.
- 750 36. Johnson TJ, Wannemuehler YM, Johnson SJ, Logue CM, White DG, Doetkott C, Nolan LK. 2007.  
751 Plasmid replicon typing of commensal and pathogenic *Escherichia coli* isolates. *Appl Environ*  
752 *Microbiol* 73:1976–1983. doi:10.1128/AEM.02171-06.
- 753 37. Wu S, Dalsgaard A, Hammerum AM, Porsbo LJ, Jensen LB. 2010. Prevalence and characterization of  
754 plasmids carrying sulfonamide resistance genes among *Escherichia coli* from pigs, pig carcasses and  
755 human. *Acta Vet Scand* 52:47. doi:10.1186/1751-0147-52-47.
- 756 38. Wibberg D, Szczepanowski R, Eikmeyer F, Pühler A, Schlüter A. 2013. The IncF plasmid pRSB225  
757 isolated from a municipal wastewater treatment plant's on-site preflooder combining antibiotic  
758 resistance and putative virulence functions is highly related to virulence plasmids identified in  
759 pathogenic *E. coli* isolates. *Plasmid* 69:127–137. doi:10.1016/j.plasmid.2012.11.001.
- 760 39. Yang Q-E, Sun J, Li L, Deng H, Liu B-T, Fang L-X, Liao X-P, Liu Y-H. 2015. IncF plasmid diversity in  
761 multi-drug resistant *Escherichia coli* strains from animals in China. *Front Microbiol* 6:964.  
762 doi:10.3389/fmicb.2015.00964.
- 763 40. Carattoli A. 2009. Resistance plasmid families in Enterobacteriaceae. *Antimicrob Agents Chemother*  
764 53:2227–2238. doi:10.1128/AAC.01707-08.
- 765 41. Bengtsson S, Naseer U, Sundsfjord A, Kahlmeter G, Sundqvist M. 2012. Sequence types and plasmid  
766 carriage of uropathogenic *Escherichia coli* devoid of phenotypically detectable resistance. *J*  
767 *Antimicrob Chemother* 67:69–73. doi:10.1093/jac/dkr421.

- 768 42. Osborn AM, da Silva Tatley FM, Steyn LM, Pickup RW, Saunders JR. 2000. Mosaic plasmids and  
769 mosaic replicons. Evolutionary lessons from the analysis of genetic diversity in IncFII-related  
770 replicons. *Microbiol* 146 (Pt 9):2267–2275. doi:10.1099/00221287-146-9-2267.
- 771 43. Liu B-T, Yang Q-E, Li L, Sun J, Liao X-P, Fang L-X, Yang S-S, Deng H, Liu Y-H. 2013. Dissemination and  
772 characterization of plasmids carrying *oqxAB-bla* CTX-M genes in *Escherichia coli* isolates from food-  
773 producing animals. *PLoS ONE* 8:e73947. doi:10.1371/journal.pone.0073947.
- 774 44. Zurfluh K, Jakobi G, Stephan R, Hächler H, Nüesch-Inderbilen M. 2014. Replicon typing of plasmids  
775 carrying *bla*CTX-M-1 in Enterobacteriaceae of animal, environmental and human origin. *Front*  
776 *Microbiol* 5:555. doi:10.3389/fmicb.2014.00555.
- 777 45. Aoki T, Mitoma Y, Crosa JH. 1986. The characterization of a conjugative R-plasmid isolated from  
778 *Aeromonas salmonicida*. *Plasmid* 16:213–218.
- 779 46. Rhodes G, Parkhill J, Bird C, Ambrose K, Jones MC, Huys G, Swings J, Pickup RW. 2004. Complete  
780 nucleotide sequence of the conjugative tetracycline resistance plasmid pFBAOT6, a member of a  
781 group of IncU plasmids with global ubiquity. *Appl Environ Microbiol* 70:7497–7510.  
782 doi:10.1128/AEM.70.12.7497-7510.2004.
- 783 47. Bhutani N, Muraleedharan C, Talreja D, Rana SW, Walia S, Kumar A, Walia SK. 2015. Occurrence of  
784 multidrug resistant extended spectrum beta-Lactamase-producing bacteria on iceberg lettuce  
785 retailed for human consumption. *Biomed Res Int* 2015:547547. doi:10.1155/2015/547547.
- 786 48. Raphael E, Wong LK, Riley LW. 2011. Extended-spectrum Beta-lactamase gene sequences in gram-  
787 negative saprophytes on retail organic and nonorganic spinach. *Appl Environ Microbiol* 77:1601–  
788 1607. doi:10.1128/AEM.02506-10.
- 789 49. Dolejska M, Villa L, Hasman H, Hansen L, Carattoli A. 2013. Characterization of IncN plasmids  
790 carrying *bla* CTX-M-1 and *qnr* genes in *Escherichia coli* and *Salmonella* from animals, the  
791 environment and humans. *J Antimicrob Chemother* 68:333–339. doi:10.1093/jac/dks387.
- 792 50. Moodley A, Guardabassi L. 2009. Transmission of IncN plasmids carrying *bla*CTX-M-1 between  
793 commensal *Escherichia coli* in pigs and farm workers. *Antimicrob Agents Chemother* 53:1709–1711.  
794 doi:10.1128/AAC.01014-08.
- 795 51. Novais A, Cantón R, Moreira R, Peixe L, Baquero F, Coque TM. 2007. Emergence and dissemination  
796 of Enterobacteriaceae isolates producing CTX-M-1-like enzymes in Spain are associated with IncFII  
797 (CTX-M-15) and broad-host-range (CTX-M-1, -3, and -32) plasmids. *Antimicrob Agents Chemother*  
798 51:796–799. doi:10.1128/AAC.01070-06.
- 799 52. Carattoli A. 2013. Plasmids and the spread of resistance. *Int J Med Microbiol* 303:298–304.  
800 doi:10.1016/j.ijmm.2013.02.001.
- 801 53. Ben Said L, Jouini A, Klibi N, Dziri R, Alonso CA, Boudabous A, Ben Slama K, Torres C. 2015.  
802 Detection of extended-spectrum beta-lactamase (ESBL)-producing Enterobacteriaceae in  
803 vegetables, soil and water of the farm environment in Tunisia. *Int J Food Microbiol* 203:86–92.  
804 doi:10.1016/j.ijfoodmicro.2015.02.023.
- 805 54. Leonard AFC, Zhang L, Balfour AJ, Garside R, Hawkey PM, Murray AK, Ukoumunne OC, Gaze WH.  
806 2018. Exposure to and colonisation by antibiotic-resistant *E. coli* in UK coastal water users.  
807 Environmental surveillance, exposure assessment, and epidemiological study (Beach Bum Survey).  
808 *Environ Int*. doi:10.1016/j.envint.2017.11.003.



- 809 55. Alves MS, Pereira A, Araújo SM, Castro BB, Correia ACM, Henriques I. 2014. Seawater is a reservoir  
810 of multi-resistant *Escherichia coli*, including strains hosting plasmid-mediated quinolones resistance  
811 and extended-spectrum beta-lactamases genes. *Front Microbiol* 5:426.  
812 doi:10.3389/fmicb.2014.00426.
- 813 56. Kim H-S, Chon J-W, Kim Y-J, Kim D-H, Kim M-s, Seo K-H. 2015. Prevalence and characterization of  
814 extended-spectrum- $\beta$ -lactamase-producing *Escherichia coli* and *Klebsiella pneumoniae* in ready-to-  
815 eat vegetables. *Int J Food Microbiol* 207:83–86. doi:10.1016/j.ijfoodmicro.2015.04.049.
- 816 57. Gillings MR, Gaze WH, Pruden A, Smalla K, Tiedje JM, Zhu Y-G. 2015. Using the class 1 integron-  
817 integrase gene as a proxy for anthropogenic pollution. *ISME J* 9:1269–1279.  
818 doi:10.1038/ismej.2014.226.
- 819 58. Amos GCA, Ploumakis S, Zhang L, Hawkey PM, Gaze WH, Wellington EMH. 2018. The widespread  
820 dissemination of integrons throughout bacterial communities in a riverine system. *ISME J* 12:681–  
821 691. doi:10.1038/s41396-017-0030-8.
- 822 59. van Elsas JD, Bailey MJ. 2002. The ecology of transfer of mobile genetic elements. *FEMS Microbiol*  
823 *Ecol* 42:187–197.
- 824 60. Schlüter A, Szczepanowski R, Puhler A, Top EM. 2007. Genomics of IncP-1 antibiotic resistance  
825 plasmids isolated from wastewater treatment plants provides evidence for a widely accessible drug  
826 resistance gene pool. *FEMS Microbiol Rev* 31:449–477. doi:10.1111/j.1574-6976.2007.00074.x.
- 827 61. Brown CJ, Sen D, Yano H, Bauer ML, Rogers LM, van der Auwera GA, Top EM. 2013. Diverse broad-  
828 host-range plasmids from freshwater carry few accessory genes. *Appl Environ Microbiol* 79:7684–  
829 7695. doi:10.1128/AEM.02252-13.
- 830 62. Thorsted, P. B. et al. 1998. Complete sequence of the IncP(beta) plasmid R751: Implications for  
831 evolution and organisation of the IncP backbone. *J Mol Biol* 282:969–990.
- 832 63. Thomas CM, Smith C. 1987. Incompatibility group P plasmids: Genetics, evolution, and use in  
833 genetic manipulation. *Annu Rev Microbiol* 41:77–101.
- 834 64. Harley JP, Prescott LM. 2002. *Laboratory exercises in microbiology*, 5th ed. McGraw-Hill, Boston,  
835 Montréal.
- 836 65. McDaniels AE, Rice EW, Reyes AL, Johnson CH, Haugland RA, Stelma GN. 1996. Confirmational  
837 identification of *Escherichia coli*, a comparison of genotypic and phenotypic assays for glutamate  
838 decarboxylase and  $\beta$ -d-glucuronidase. *Appl Environ Microbiol* 62:3350–3354.
- 839 66. Heuer ,H., Krögerrecklenfort, E., Wellington,E.M.H., Egan,S., van Elsas, J.D., van Overbeek,L.,  
840 Collard,J.M., Guillaume, G., Karagouni, A.D., Nikolakopoulo ,T.L., Smalla, K. 2002. Gentamicin  
841 resistance genes in environmental bacteria: prevalence and transfer. *FEMS Microbiol Ecol* 42:289–  
842 302.
- 843 67. Rademaker LW, Frank J., Frans JB. 1997. Characterization of the diversity of ecologically important  
844 microbes by rep-PCR genomic fingerprinting.,p.1-26. In A. D. L. Akkermans, J. D. van Elsas, and F. J.  
845 de Bruin (ed), *Molecular Microbial Ecology Manual II*, 2nd ed. Kluwer Academic Publishers,  
846 Dordrecht, The Netherlands.
- 847 68. Alvarado A, Garcillán-Barcia MP, La Cruz F de. 2012. A Degenerate Primer MOB Typing (DPMT)  
848 method to classify Gamma-Proteobacterial plasmids in clinical and environmental settings. *PLoS*  
849 *ONE* 7:e40438. doi:10.1371/journal.pone.0040438.

- 850 69. Shintani M, Sanchez ZK, Kimbara K. 2015. Genomics of microbial plasmids. Classification and  
851 identification based on replication and transfer systems and host taxonomy. *Front Microbiol* 6:242.  
852 doi:10.3389/fmicb.2015.00242.
- 853 70. Garcillán-Barcia MP, Francia MV, La Cruz F de. 2009. The diversity of conjugative relaxases and its  
854 application in plasmid classification. *FEMS Microbiol Rev* 33:657–687. doi:10.1111/j.1574-  
855 6976.2009.00168.x.
- 856 71. Sambrook J, Fritsch EF, Maniatis T (ed.). 1989. *Molecular cloning : a laboratory manual*, 2nd ed.  
857 Cold Spring Harbor Laboratory Press, New York.
- 858 72. Binh CTT, Heuer H, Kaupenjohann M, Smalla K. 2008. Piggery manure used for soil fertilization is a  
859 reservoir for transferable antibiotic resistance plasmids. *FEMS Microbiol Ecol* 66:25–37.  
860 doi:10.1111/j.1574-6941.2008.00526.x.
- 861 73. Carattoli A, Bertini A, Villa L, Falbo V, Hopkins KL, Threlfall EJ. 2005. Identification of plasmids by  
862 PCR-based replicon typing. *J Microbiol Methods* 63:219–228. doi:10.1016/j.mimet.2005.03.018.
- 863 74. Dealtry S, Ding G-C, Weichert V, Dunon V, Schlüter A, Martini MC, Del Papa MF, Lagares A, Amos  
864 GCA, Wellington EMH, Gaze WH, Sipkema D, Sjöling S, Springael D, Heuer H, van Elsas JD, Thomas  
865 C, Smalla K. 2014. Cultivation-independent screening revealed hot spots of IncP-1, IncP-7 and IncP-  
866 9 plasmid occurrence in different environmental habitats. *PLoS ONE* 9:e89922.  
867 doi:10.1371/journal.pone.0089922.
- 868 75. Jechalke S, Schreiter S, Wolters B, Dealtry S, Heuer H, Smalla K. 2013. Widespread dissemination of  
869 class 1 integron components in soils and related ecosystems as revealed by cultivation-  
870 independent analysis. *Front Microbiol* 4:420. doi:10.3389/fmicb.2013.00420.
- 871 76. Guarddon M, Miranda JM, Rodríguez JA, Vázquez BI, Cepeda A, Franco CM. 2011. Real-time  
872 polymerase chain reaction for the quantitative detection of tetA and tetB bacterial tetracycline  
873 resistance genes in food. *Int J Food Microbiol* 146:284–289. doi:10.1016/j.ijfoodmicro.2011.02.026.
- 874 77. Heuer H, Smalla K. 2007. Manure and sulfadiazine synergistically increased bacterial antibiotic  
875 resistance in soil over at least two months. *Environ Microbiol* 9:657–666. doi:10.1111/j.1462-  
876 2920.2006.01185.x.
- 877 78. Barraud O, Baclet MC, Denis F, Ploy MC. 2010. Quantitative multiplex real-time PCR for detecting  
878 class 1, 2 and 3 integrons. *J Antimicrob Chemother* 65:1642–1645. doi:10.1093/jac/dkq167.
- 879 79. Walsh F, Ingenfeld A, Zampiccoli M, Hilber-Bodmer M, Frey JE, Duffy B. 2011. Real-time PCR  
880 methods for quantitative monitoring of streptomycin and tetracycline resistance genes in  
881 agricultural ecosystems. *J Microbiol Methods* 86:150–155. doi:10.1016/j.mimet.2011.04.011.
- 882 80. Jechalke S, Dealtry S, Smalla K, Heuer H. 2013. Quantification of IncP-1 plasmid prevalence in  
883 environmental samples. *Appl Environ Microbiol* 79:1410–1413. doi:10.1128/AEM.03728-12.
- 884 81. Smith MS, Yang RK, Knapp CW, Niu Y, Peak N, Hanfelt MM, Galland JC, Graham DW. 2004.  
885 Quantification of tetracycline resistance genes in feedlot lagoons by real-time PCR. *Appl Environ*  
886 *Microbiol* 70:7372–7377. doi:10.1128/AEM.70.12.7372-7377.2004.
- 887 82. Osborn AM, Bruce KD, Strike P, Ritchie DA. 1993. Polymerase chain reaction-restriction fragment  
888 length polymorphism analysis shows divergence among mer determinants from gram-negative soil  
889 bacteria indistinguishable by DNA-DNA hybridization. *Appl Environ Microbiol* 59:4024–4030.

- 890 83. Stürenburg E, Kühn A, Mack D, Laufs R. 2004. A novel extended-spectrum beta-lactamase CTX-M-  
891 23 with a P167T substitution in the active-site omega loop associated with ceftazidime resistance. *J*  
892 *Antimicrob Chemother* 54:406–409. doi:10.1093/jac/dkh334.
- 893 84. Providenti MA, O'Brien JM, Ewing RJ, Paterson ES, Smith ML. 2006. The copy-number of plasmids  
894 and other genetic elements can be determined by SYBR-Green-based quantitative real-time PCR. *J*  
895 *Microbiol Methods* 65:476–487. doi:10.1016/j.mimet.2005.09.007.
- 896 85. Götz A, Pukall R, Smit E, Tietze E, Prager R, Tschäpe H, van Elsas JD, Smalla K. 1996. Detection and  
897 characterization of broad-host-range plasmids in environmental bacteria by PCR. *Appl Environ*  
898 *Microbiol* 62:2621–2628.
- 899 86. Marti E, Balcázar JL. 2013. Real-Time PCR assays for quantification of qnr genes in environmental  
900 water samples and chicken feces. *Appl Environ Microbiol* 79:1743–1745. doi:10.1128/AEM.03409-  
901 12.

902

903

904

905

906

907

908

909

910

911

912

913

914

915

916

917

918

919

920

921

922

923

924

925

926

927

928

929

930

931 **TABLE 1** Characterization of representative tetracycline resistant *E. coli* isolates from  
932 fresh produce

| <i>E. coli</i> isolates <sup>a</sup> | Sample source <sup>b</sup> | Time point (D) | Inc groups <sup>c</sup>                               | <i>bla</i> genes                                          | Resistance and integrase genes                  | Antibiotic resistance profile <sup>d</sup>         |
|--------------------------------------|----------------------------|----------------|-------------------------------------------------------|-----------------------------------------------------------|-------------------------------------------------|----------------------------------------------------|
| EK2.1 <sup>D</sup>                   | Ci                         | 0              | FII <sup>l</sup>                                      | <i>bla</i> <sub>TEM</sub>                                 | <i>tet(A), qnrS</i>                             | AM, AMX, TE, CIP, OFX                              |
| EK2.2 <sup>E</sup>                   | Ci                         | 0              | U <sup>h</sup>                                        | <i>bla</i> <sub>TEM</sub>                                 | <i>int11, tet(A), sul2, strA, qnrS</i>          | AM, AMX, TE, S, TMP, SD, CIP, OFX                  |
| EK2.5 <sup>D</sup>                   | Ci                         | 0              | I1 <sup>l</sup>                                       | <i>bla</i> <sub>TEM</sub>                                 | <i>tet(A), qnrS</i>                             | AM, AMX, TE, CIP                                   |
| EK2.7 <sup>D</sup>                   | Ci                         | 0              | U <sup>h</sup>                                        | <i>bla</i> <sub>TEM</sub>                                 | <i>int11, tet(A), sul2, strA, qnrS</i>          | AM, AMX, TE, S, TMP, SD, OFX                       |
| EK2.8 <sup>D</sup>                   | Ci                         | 0              | I1 <sup>l</sup>                                       | <i>bla</i> <sub>TEM</sub>                                 | <i>int11, tet(A), sul2, strA</i>                | AM, AMX, TE, S, TMP                                |
| EK2.11 <sup>D</sup>                  | Ci                         | 0              | I1 <sup>l</sup>                                       | <i>bla</i> <sub>TEM</sub>                                 | <i>tet(A)</i>                                   | AM, AMX, TE                                        |
| EK2.15 <sup>D</sup>                  | Ci                         | 0              | I1 <sup>l</sup>                                       | <i>bla</i> <sub>TEM</sub>                                 | <i>tet(A), sul2</i>                             | AM, AMX, TE                                        |
| EK2.16 <sup>U</sup>                  | Ci                         | 0              | N <sup>g</sup>                                        | <i>bla</i> <sub>TEM</sub>                                 | <i>tet(A), sul2, sul3, strA</i>                 | AM, AMX, TE, S                                     |
| EK2.18 <sup>D</sup>                  | Ci                         | 0              | X1 <sup>h</sup>                                       | <i>bla</i> <sub>TEM</sub>                                 | <i>tet(A), sul2, sul3, strA</i>                 | AM, AMX, TE, S                                     |
| EK2.19 <sup>E</sup>                  | Ci                         | 0              | FII <sup>l</sup>                                      | <i>bla</i> <sub>TEM</sub>                                 | <i>int11, tet(A), merRTΔP, sul2, aadA</i>       | AM, AMX, TE, S, TMP, D, GM, KM                     |
| EK2.20 <sup>E</sup>                  | Ci                         | 0              | HI1 <sup>h</sup>                                      | <i>bla</i> <sub>TEM</sub>                                 | <i>int11, tet(A), sul2, sul3, aadA, qnrS</i>    | AM, AMX, TE, S, TMP, SD, GM, OFX, C                |
| EK2.21 <sup>E</sup>                  | Ci                         | 0              | X1 <sup>h</sup>                                       | <i>bla</i> <sub>TEM</sub>                                 | <i>int11, tet(A)</i>                            | AM, AMX, TE, OFX                                   |
| EK2.22 <sup>E</sup>                  | Ci                         | 0              | X1 <sup>h</sup>                                       | <i>bla</i> <sub>TEM</sub>                                 | <i>int11, tet(A), strA, qnrS</i>                | AM, AMX, TE, S, TMP, SD, OFX                       |
| EK2.25 <sup>E</sup>                  | Ci                         | 0              | U <sup>h</sup> , X1 <sup>h</sup>                      | <i>bla</i> <sub>TEM</sub>                                 | <i>int11, tet(A), sul2, strA, qnrS</i>          | AM, AMX, TE, S, TMP, SD, CIP, OFX                  |
| EK2.26 <sup>E</sup>                  | Ci                         | 0              | U <sup>h</sup>                                        | <i>bla</i> <sub>TEM</sub>                                 | <i>int11, tet(A), sul1, aadA, qacEΔ1, strA</i>  | AM, AMX, TE, S, TMP, SD, CIP, NA, OFX              |
| EK2.29 <sup>E,k</sup>                | Ci                         | 0              | N <sup>g</sup>                                        | <i>bla</i> <sub>TEM</sub> , <i>bla</i> <sub>CTX-M-1</sub> | <i>int11, tet(A), sul1, strA, qnrS</i>          | AM, AMX, TE, S, TMP, SD, CRO, CTX, OFX, CIP        |
| EK2.30 <sup>E</sup>                  | Ci                         | 0              | U <sup>h</sup>                                        | <i>bla</i> <sub>TEM</sub>                                 | <i>int11, tet(A), sul1, sul3, aadA, qnrS</i>    | AM, AMX, TE, TMP, SD, C                            |
| EK3.33 <sup>E</sup>                  | Ci                         | 0              | X1 <sup>h</sup>                                       | -                                                         | <i>int11, sul1, strA</i>                        | TE, D                                              |
| EK3.34 <sup>D</sup>                  | Ci                         | 0              | FII <sup>l</sup>                                      | <i>bla</i> <sub>TEM</sub>                                 | <i>int11, tet(A), sul1, strA</i>                | AM, AMX, TE, S, TMP, SD, NA, OFX                   |
| EK3.35 <sup>D</sup>                  | Ci                         | 0              | FII <sup>l</sup>                                      | <i>bla</i> <sub>TEM</sub>                                 | <i>tet(A), sul1</i>                             | AM, AMX, TE, S, TMP, SD, NA                        |
| EK3.36 <sup>E</sup>                  | Ci                         | 0              | FIB <sup>l</sup>                                      | <i>bla</i> <sub>TEM</sub>                                 | <i>int11, tet(A), merRTΔP, sul1, aadA</i>       | AM, AMX, TE, S, TMP, D, GM, KM                     |
| EK3.43 <sup>E,k</sup>                | Ci                         | 0              | N <sup>g</sup>                                        | <i>bla</i> <sub>CTX-M-1</sub>                             | <i>tet(A), sul1, qnrS</i>                       | AM, AMX, TE, S, D, GM, CTX, OFX                    |
| EK3.44 <sup>E,k</sup>                | Ci                         | 7              | N <sup>g</sup>                                        | <i>bla</i> <sub>TEM</sub> , <i>bla</i> <sub>CTX-M-1</sub> | <i>int11, tet(A), merRTΔP, sul1, strA, qnrS</i> | AM, AMX, TE, S, TMP, SD, CRO, CTX, C, NA, CIP, OFX |
| EK5.16 <sup>E</sup>                  | Ci                         | 7              | FII <sup>l</sup> , I1 <sup>f</sup>                    | <i>bla</i> <sub>TEM</sub>                                 | <i>int11, tet(A), aadA, qacEΔ1, qnrS</i>        | AM, AMX, TE, S, TMP, D, OFX                        |
| EK5.19 <sup>E</sup>                  | Ci                         | 7              | X1 <sup>h</sup>                                       | <i>bla</i> <sub>TEM</sub>                                 | <i>int11, tet(A), sul2, strA, qnrS</i>          | AM, AMX, TE, S, TMP, SD, D, C                      |
| EK5.20 <sup>E</sup>                  | Ci                         | 7              | FII <sup>l</sup> , I1 <sup>f</sup>                    | <i>bla</i> <sub>TEM</sub>                                 | <i>int11, tet(A), aadA, qacEΔ1, qnrS</i>        | AM, AMX, TE, S, TMP, OFX                           |
| EK5.25 <sup>E</sup>                  | Ci                         | 7              | FII <sup>l</sup>                                      | <i>bla</i> <sub>TEM</sub>                                 | <i>int11, tet(A), qacEΔ1, qnrS</i>              | AM, AMX, TE, TMP, OFX                              |
| EK5.28 <sup>E</sup>                  | Ci                         | 7              | FII <sup>l</sup> , I1 <sup>f</sup>                    | <i>bla</i> <sub>TEM</sub>                                 | <i>int11, tet(A), aadA, qacEΔ1, qnrS</i>        | AM, AMX, TE, S, TMP, CIP, OFX                      |
| EK5.30 <sup>E</sup>                  | Ci                         | 7              | FII <sup>l</sup> , FIB <sup>l</sup> , I1 <sup>f</sup> | <i>bla</i> <sub>TEM</sub>                                 | <i>int11, tet(A), sul1, aadA, qacEΔ1, qnrS</i>  | AM, AMX, TE, TMP, SD, D, CIP, NA, OFX              |
| EK5.32 <sup>E</sup>                  | Ci                         | 7              | X1 <sup>h</sup>                                       | <i>bla</i> <sub>TEM</sub>                                 | <i>int11, tet(A), sul1, sul2, strA, qnrS</i>    | AM, AMX, TE, S, TMP, SD, OFX, C                    |
| EK5.40 <sup>E</sup>                  | Ci                         | 7              | X1 <sup>h</sup>                                       | <i>bla</i> <sub>TEM</sub>                                 | <i>int11, tet(A), sul2, strA, qnrS</i>          | AM, AMX, TE, S, TMP, SD, C                         |
| EK7.6 <sup>E</sup>                   | Ci                         | 7              | U <sup>h</sup>                                        | <i>bla</i> <sub>TEM</sub>                                 | <i>int11, tet(A)</i>                            | AM, AMX, TE, TMP, D                                |
| EK7.7 <sup>E</sup>                   | Ci                         | 7              | I1 <sup>f</sup>                                       | <i>bla</i> <sub>TEM</sub>                                 | <i>int11, tet(A), qacEΔ1, aadA</i>              | AM, AMX, TE, TMP                                   |
| EK7.9 <sup>E</sup>                   | Ci                         | 7              | X1 <sup>f</sup>                                       | <i>bla</i> <sub>TEM</sub>                                 | <i>int11, tet(A), merRTΔP, sul2, qnrS</i>       | AM, AMX, TE, SD, CRO, D, CIP, C, GM, OFX           |

933

934 **TABLE 1 (continued)**

| <i>E. coli</i> isolates <sup>a</sup> | Sample source <sup>b</sup> | Time point (D) | Inc groups <sup>c</sup>             | <i>bla</i> genes          | Resistance and integrase genes                                   | Antibiotic resistance profile <sup>d</sup> |
|--------------------------------------|----------------------------|----------------|-------------------------------------|---------------------------|------------------------------------------------------------------|--------------------------------------------|
| EK7.10 <sup>E</sup>                  | Ci                         | 7              | HI1 <sup>h</sup>                    | <i>bla</i> <sub>TEM</sub> | <i>intl1, tet(A), merRTΔP, sul2, qnrS</i>                        | AM, AMX, TE, SD, CRO, D, CIP, C, GM, OFX   |
| EK7.11 <sup>E</sup>                  | Ci                         | 7              | FII <sup>l</sup> , I1 <sup>f</sup>  | <i>bla</i> <sub>TEM</sub> | <i>intl1, tet(A), aadA, qacEΔ1, qnrS</i>                         | AM, AMX, TE, TMP, CIP                      |
| EK7.12 <sup>E</sup>                  | Ci                         | 7              | FII <sup>l</sup> , I1 <sup>f</sup>  | <i>bla</i> <sub>TEM</sub> | <i>intl1, tet(A), aadA, qacEΔ1, qnrS</i>                         | AM, AMX, TE, TMP                           |
| EK7.13 <sup>E</sup>                  | Ci                         | 7              | FIB <sup>l</sup> , I1 <sup>f</sup>  | <i>bla</i> <sub>TEM</sub> | <i>intl1, tet(A), aadA, qacEΔ1, qnrS</i>                         | AM, AMX, TE, TMP, OFX                      |
| EK7.14 <sup>E</sup>                  | Ci                         | 7              | FII <sup>l</sup>                    | <i>bla</i> <sub>TEM</sub> | <i>intl1, aadA, qacEΔ1, qnrS</i>                                 | AM, AMX, TE, TMP                           |
| EK7.15 <sup>E</sup>                  | Ci                         | 7              | FII <sup>l</sup>                    | <i>bla</i> <sub>TEM</sub> | <i>intl1, tet(A), sul1, sul2, aadA, qacEΔ1, qnrS</i>             | AM, AMX, TE, S, TMP, SD, CIP, GM           |
| EK7.16 <sup>E</sup>                  | Ci                         | 7              | FII <sup>l</sup>                    | <i>bla</i> <sub>TEM</sub> | <i>intl1, tet(A), sul1, sul2, strA, qacEΔ1, qnrS</i>             | AM, AMX, TE, S, TMP, SD, CIP, OFX          |
| EK7.17 <sup>E</sup>                  | Ci                         | 7              | FII <sup>l</sup> , X1 <sup>h</sup>  | <i>bla</i> <sub>TEM</sub> | <i>tet(A), qnrS</i>                                              | AM, AMX, TE, CIP, OFX                      |
| EK7.18 <sup>E</sup>                  | Ci                         | 7              | FII <sup>l</sup>                    | <i>bla</i> <sub>TEM</sub> | <i>intl1, tet(A), sul2, strA, qnrS</i>                           | AM, AMX, TE, S, TMP, SD, CIP, OFX          |
| EK7.19 <sup>E</sup>                  | Ci                         | 7              | FIB <sup>l</sup> , I1 <sup>f</sup>  | <i>bla</i> <sub>TEM</sub> | <i>intl1, tet(A), aadA, qacEΔ1, qnrS</i>                         | AM, AMX, TE, TMP                           |
| EK7.21 <sup>E</sup>                  | Ci                         | 7              | FIB <sup>l</sup> , I1 <sup>f</sup>  | <i>bla</i> <sub>TEM</sub> | <i>intl1, tet(A), aadA, qacEΔ1, qnrS</i>                         | AM, AMX, TE, TMP, OFX                      |
| EK7.22 <sup>E</sup>                  | Ci                         | 7              | FII <sup>l</sup> , FIB <sup>l</sup> | <i>bla</i> <sub>TEM</sub> | <i>intl1, tet(A), sul1, sul2, sul3, aadA, strA, qacEΔ1, qnrS</i> | AM, AMX, TE, S, TMP, SD, CIP, GM, NA, OFX  |
| EK7.24 <sup>E</sup>                  | Ci                         | 7              | FII <sup>l</sup> , I1 <sup>f</sup>  | <i>bla</i> <sub>TEM</sub> | <i>intl1, tet(A), sul1, sul2, aadA, strA, qacEΔ1, qnrB, qnrS</i> | AM, AMX, TE, S, TMP, SD, CIP, OFX, C       |
| EK7.26 <sup>E</sup>                  | Ci                         | 7              | FIB <sup>l</sup> , I1 <sup>f</sup>  | <i>bla</i> <sub>TEM</sub> | <i>intl1, tet(A), aadA, qacEΔ1, qnrS</i>                         | AM, AMX, TE, TMP, CIP, OFX                 |
| EK7.27 <sup>E</sup>                  | Ci                         | 7              | X1 <sup>h</sup>                     | <i>bla</i> <sub>TEM</sub> | <i>tet(A), merRTΔP, sul2, qnrS</i>                               | AM, AMX, TE, SD, CRO, D, CIP, C, GM, OFX   |
| EK7.28 <sup>E</sup>                  | Ci                         | 7              | FIB <sup>l</sup> , I1 <sup>f</sup>  | <i>bla</i> <sub>TEM</sub> | <i>intl1, tet(A), aadA, qacEΔ1, qnrS</i>                         | AM, AMX, TE, TMP                           |
| EK7.29 <sup>E</sup>                  | Ci                         | 7              | FII <sup>l</sup> , FIB <sup>l</sup> | <i>bla</i> <sub>TEM</sub> | <i>intl1, tet(A), sul1, aadA, qacEΔ1, qnrS</i>                   | AM, AMX, TE, S, TMP, SD, D, CIP, NA, OFX   |
| EK7.30 <sup>E</sup>                  | Ci                         | 7              | FII <sup>l</sup>                    | <i>bla</i> <sub>TEM</sub> | <i>intl1, tet(A), sul1, sul2, aadA, qacEΔ1, qnrS</i>             | AM, AMX, TE, S, TMP, SD, GM                |
| EK6.1 <sup>E</sup>                   | Ci                         | 7              | FII <sup>l</sup>                    | -                         | <i>intl1, tet(A), sul2, strA</i>                                 | TE, S                                      |
| EK6.3 <sup>E</sup>                   | Ci                         | 7              | FIB <sup>l</sup>                    | -                         | <i>tet(A), sul2, strA</i>                                        | TE, S                                      |
| M1 <sup>E</sup>                      | MS                         | 0              | ND                                  | <i>bla</i> <sub>TEM</sub> | <i>intl1, tet(A), sul1, sul2, qacEΔ1, strA, merRTΔP</i>          | AM, AMX, TE, S, TMP, SD, D                 |
| M19 <sup>E</sup>                     | MS                         | 0              | ND                                  | <i>bla</i> <sub>TEM</sub> | <i>intl1, tet(A), sul1, sul2, qacEΔ1, strA</i>                   | AM, AMX, TE, S, TMP, SD, D                 |
| RE1 <sup>D</sup>                     | A                          | 0              | FII <sup>l</sup>                    | -                         | -                                                                | TE, D                                      |
| RE4 <sup>D</sup>                     | A                          | 0              | I1                                  | -                         | <i>intl1, tet(A), sul3, aadA, merRTΔP</i>                        | TE, S, TMP, SD, D, CIP, NA                 |
| RE9 <sup>D</sup>                     | A                          | 0              | I1 <sup>l</sup>                     | -                         | <i>intl1, tet(A), sul3, aadA, merRTΔP</i>                        | TE, S, TMP, SD, D, CIP, NA                 |
| RE10 <sup>D</sup>                    | A                          | 0              | I1 <sup>f</sup>                     | -                         | <i>intl1, tet(A), sul3, aadA, merRTΔP</i>                        | TE, S, TMP, SD, D, CIP, NA                 |
| RE11 <sup>E</sup>                    | A                          | 0              | I1 <sup>f</sup>                     | -                         | <i>intl1, tet(A), sul3, aadA, merRTΔP</i>                        | TE, S, TMP, SD, D, CIP, NA                 |
| RE14 <sup>E</sup>                    | A                          | 7              | FII <sup>l</sup>                    | -                         | -                                                                | TE, D                                      |
| RE19 <sup>E</sup>                    | A                          | 7              | I1 <sup>f</sup>                     | -                         | <i>intl1, tet(A), sul3, aadA, merRTΔP</i>                        | TE, S, TMP, SD, D, CIP, NA                 |

935 <sup>a</sup>: D: Direct plating; E: Enrichment.

936 <sup>b</sup>: Ci: Cilantro; MS: Mixed salad; A: Arugula.

937 <sup>c</sup>: l: detected by RT-PCR and PBRT; f: detected by RT-PCR; g: detected by PCR; h: detected by PBRT; k: Conjugal transfer into *E. coli* CV601.

939 <sup>d</sup>: C: Chloramphenicol; AM: Ampicillin; AMX: Amoxicillin; TE: Tetracycline; S: Streptomycin; TMP: Trimethoprim; SD: Sulfadiazine; CIP: Ciprofloxacin; OFX: Ofloxacin; D: Doxycycline; GM: Gentamicin; NA: Nalidixic acid; CRO:

941 Ceftriaxone; CTX: Cefotaxime.

942 ND: not detected.

943

944 **TABLE 2** Characterization of representative tetracycline resistant *E. coli* CV601  
 945 transconjugants captured from produce.

| TET <sup>R</sup> <i>E. coli</i> |                            |                                      |                           |                                                                                      |                                            |  |
|---------------------------------|----------------------------|--------------------------------------|---------------------------|--------------------------------------------------------------------------------------|--------------------------------------------|--|
| CV601 transconjugants           | Sample source <sup>a</sup> | Inc groups <sup>b</sup>              | <i>bla</i> genes          | Resistance, integrase genes and IS <sup>c</sup>                                      | Antibiotic resistance profile <sup>d</sup> |  |
| pBC1.1                          | Ci                         | P-1β <sup>†</sup>                    | <i>bla</i> <sub>TEM</sub> | <i>intl1</i> , <i>tet(A)</i> , <i>merRTΔP</i> , <i>qacEΔ1</i> , IS1071               | TE, AM, AMX, D                             |  |
| pBC1.3                          | Ci                         | P-1β <sup>†</sup>                    | -                         | <i>intl1</i> , <i>tet(A)</i> , <i>merRTΔP</i> , <i>qacEΔ1</i> , IS1071               | TE, AM, AMX, D                             |  |
| pBC1.9                          | Ci                         | P-1β <sup>†</sup> , FII <sup>†</sup> | <i>bla</i> <sub>TEM</sub> | <i>intl1</i> , <i>tet(A)</i> , <i>merRTΔP</i> , <i>qacEΔ1</i> , IS1071               | TE, AM, AMX, D                             |  |
| pBC1.12                         | Ci                         | P-1β <sup>†</sup> , FII <sup>†</sup> | -                         | <i>intl1</i> , <i>tet(A)</i> , <i>merRTΔP</i> , <i>strA</i> , <i>qacEΔ1</i> , IS1071 | TE, AM, AMX, D, S                          |  |
| pBC2.1                          | Ci                         | FIB <sup>†</sup>                     | <i>bla</i> <sub>TEM</sub> | <i>tet(A)</i> , <i>sul1</i> , <i>qnrS</i>                                            | TE, AM, AMX, D, CIP, NA, OFX, C            |  |
| pBC2.2                          | Ci                         | FIB <sup>†</sup>                     | <i>bla</i> <sub>TEM</sub> | <i>tet(A)</i> , <i>qnrS</i>                                                          | TE, AM, AMX, D, CIP, OFX                   |  |
| pBC2.3                          | Ci                         | FIB <sup>†</sup> , I1 <sup>†</sup>   | <i>bla</i> <sub>TEM</sub> | <i>tet(A)</i> , <i>qnrS</i>                                                          | TE, AM, AMX, D, CIP, OFX                   |  |
| pBC2.4                          | Ci                         | FIB <sup>†</sup>                     | <i>bla</i> <sub>TEM</sub> | <i>tet(A)</i> , <i>sul2</i> , <i>qnrS</i>                                            | TE, AM, AMX, D, CIP, NA, OFX               |  |
| pBC2.6                          | Ci                         | FIB <sup>†</sup>                     | <i>bla</i> <sub>TEM</sub> | <i>tet(A)</i> , <i>qnrS</i>                                                          | TE, AM, AMX, D, CIP, OFX, C                |  |
| PBC2.8                          | Ci                         | FIB <sup>†</sup>                     | <i>bla</i> <sub>TEM</sub> | <i>tet(A)</i> , <i>qnrS</i>                                                          | TE, AM, AMX, D, CIP, NA, OFX               |  |
| pBC2.11                         | Ci                         | FII <sup>†</sup>                     | <i>bla</i> <sub>TEM</sub> | <i>tet(A)</i> , <i>qnrS</i>                                                          | TE, AM, AMX, D, CIP, OFX                   |  |
| pBC2.15                         | Ci                         | I1 <sup>†</sup>                      | <i>bla</i> <sub>TEM</sub> | <i>tet(A)</i> , <i>qnrS</i>                                                          | TE, AM, AMX, D, CIP, OFX                   |  |
| pBMS1                           | MS                         | FII <sup>†</sup>                     | <i>bla</i> <sub>TEM</sub> | <i>intl1</i> , <i>tet(Q)</i> , <i>sul1</i> , <i>strA</i> , <i>merRTΔP</i>            | TE, AM, AMX, D, TMP, C, S, SD              |  |
| pBMS4                           | MS                         | FII <sup>†</sup>                     | <i>bla</i> <sub>TEM</sub> | <i>intl1</i> , <i>sul1</i> , <i>strA</i> , <i>merRTΔP</i>                            | TE, AM, AMX, D, TMP, C, S, SD              |  |
| pBA1                            | A                          | ND                                   | <i>bla</i> <sub>TEM</sub> | <i>tet(A)</i>                                                                        | TE, AM, AMX, D, TMP, C, CIP                |  |
| <i>E. coli</i> CV601 (R)        | -                          | -                                    | -                         | -                                                                                    | -                                          |  |

946 <sup>a</sup>: Ci: Cilantro; MS: Mixed salad; A: Arugula.

947 <sup>b</sup>: I: detected by RT-PCR and PBRT; f: detected by RT-PCR.

948 <sup>c</sup>: IS, Insertion Sequence.

949 <sup>d</sup>: C: Chloramphenicol; AM: Ampicillin; AMX: Amoxicillin; TE: Tetracycline; CIP: Ciprofloxacin; OFX: Ofloxacin; D:  
 950 Doxycycline; NA: Nalidixic acid; TMP: Trimethoprim; SD: Sulfadiazine.

951 ND: not detected.

952  
 953  
 954  
 955  
 956  
 957  
 958  
 959  
 960  
 961  
 962  
 963  
 964  
 965  
 966  
 967  
 968  
 969

970 **TABLE 3** PCR hybridization and real-time PCR of IncF, I1, I2 plasmids and *intl1* and *tet(A)* from  
 971 TC-DNA extracted from fresh produce before and after enrichment.

| Fresh produce | DNA Isolation     | Time point (D) | IncF              |                     | IncI1             |                    | IncI2 |                    | <i>intl1</i>      |                     | <i>tet(A)</i>     |                     |
|---------------|-------------------|----------------|-------------------|---------------------|-------------------|--------------------|-------|--------------------|-------------------|---------------------|-------------------|---------------------|
|               |                   |                | qPCR              | Blot                | qPCR              | Blot               | qPCR  | Blot               | qPCR              | Blot                | qPCR              | Blot                |
| Mixed salad   | Direct extraction | 0              | -                 | -                   | -                 | -                  | -     | +++                | +                 | (+++)               | -                 | (++) <sup>1*</sup>  |
|               |                   | 7              | -                 | -                   | -                 | -                  | -     | +++                | +                 | (+++)               | -                 | (+++) <sup>2*</sup> |
|               | Enrichment        | 0              | +                 | (+++)               | +                 | (++)               | +     | +++                | +                 | (+++)               | +                 | (++) <sup>2*</sup>  |
|               |                   | 7              | +                 | (+++)               | +                 | (++)               | +     | +++                | +                 | (+++)               | +                 | +++                 |
| Arugula       | Direct extraction | 0              | -                 | -                   | -                 | -                  | -     | (++) <sup>3*</sup> | +                 | (++)                | -                 | (+++) <sup>2*</sup> |
|               |                   | 7              | -                 | -                   | -                 | -                  | -     | (++) <sup>1*</sup> | +                 | (++)                | -                 | (+++) <sup>1*</sup> |
|               | Enrichment        | 0              | +                 | (+++)               | -                 | -                  | +     | +++                | +                 | (++)                | +                 | +++                 |
|               |                   | 7              | +                 | (+++)               | -                 | -                  | +     | +++                | +                 | (++)                | +                 | +++                 |
| Cilantro      | Direct extraction | 0              | -                 | -                   | -                 | -                  | -     | -                  | (+) <sup>1*</sup> | (++)                | (+) <sup>1*</sup> | (+++) <sup>3*</sup> |
|               |                   | 7              | (+) <sup>1*</sup> | (++) <sup>2*</sup>  | -                 | -                  | -     | -                  | (+) <sup>3*</sup> | (+++)               | (+) <sup>2*</sup> | (+++) <sup>3*</sup> |
|               | Enrichment        | 0              | (+) <sup>2*</sup> | (+++) <sup>2*</sup> | (+) <sup>1*</sup> | (++) <sup>2*</sup> | -     | -                  | (+) <sup>3*</sup> | (+++)               | (+) <sup>2*</sup> | (+++) <sup>3*</sup> |
|               |                   | 7              | (+) <sup>2*</sup> | (+++) <sup>2*</sup> | (+) <sup>2*</sup> | (++) <sup>2*</sup> | -     | -                  | (+) <sup>3*</sup> | (+++) <sup>3*</sup> | (+) <sup>3*</sup> | (+++) <sup>3*</sup> |

972 (\*): Number of positive replicates, -: Not detected or no signal, +: positive (qPCR), (++): Medium signal,  
 973 (+++): Strong signal  
 974  
 975  
 976  
 977  
 978  
 979  
 980  
 981  
 982  
 983  
 984  
 985  
 986  
 987  
 988  
 989  
 990  
 991  
 992  
 993  
 994  
 995  
 996  
 997  
 998  
 999  
 1000  
 1001  
 1002  
 1003

1004 **TABLE 4** PCR and qPCR primer systems used in this study.

| Gene target                  | Primer         | Primer and Probe (5'-3' )        | size (bp) | Reference  |
|------------------------------|----------------|----------------------------------|-----------|------------|
| <i>qacEΔ1</i>                | qacEall-F      | CGCATTATTTTCTTTCTCTGGTT          | 69        | (75)       |
|                              | qacEall-R      | CCCGACCAGACTGCATAAGC             |           |            |
|                              | qacEall-P      | TGAAATCCATCCCTGTCGGTGT           |           |            |
| <i>tet(A)</i>                | tetA-qfw       | CCGCGCTTTGGGTCATT                | 504       | (76)       |
|                              | tetA_qrv       | TGGTCGCGTCCCAGTGA                |           |            |
|                              | q-tetA-P       | TCGGCGAGGATCG                    |           |            |
| <i>sul1</i>                  | q-sul_1 653f   | CCGTTGGCCTTCCTGTAAAG             | 965       | (77)       |
|                              | q-sul_1 719r   | TTGCCGATCGCGTGAAGT               |           |            |
|                              | tp_sul1        | CAGCGAGCCTTGC GGCGG              |           |            |
| <i>sul2</i>                  | q_sul2 595f    | CGGCTGCGCTTCGATT                 | 865       | (77)       |
|                              | q_sul2 654f    | CGCGCGCAGAAAGGATT                |           |            |
|                              | tp_sul2 614    | CGGTGCTTCTGTCTGTTTCGCGC          |           |            |
| <i>sul3</i>                  | Sul3-F         | CAGATAAGGCAATTGAGCATGCTCTGC      | 569       | (37)       |
|                              | Sul3-R         | AGAATGATTTCCGTGACTGCAATCATT      |           |            |
| <i>int1</i>                  | int1-LC1       | GCCTTGATGTTACCCGAGAG             | 196       | (78)       |
|                              | int1-LC5       | GATCGGTGCAATGCGTGT               |           |            |
|                              | int1-P         | ATTCTGGCCGTGGTTCTGGGTTTT         |           |            |
| <i>aadA</i>                  | q-aadA-Fw      | TTGATTTGCTGGTTACTGTG             | 635       | (79)       |
|                              | q-aadA-Rv      | CTTAGTGTGATCTCGCCTTT             |           |            |
|                              | q-aadA-P       | TGGTAGGTCCAGCGCGGAG              |           |            |
| <i>korB</i>                  | korB-F         | TCATCGACAACGACTACAACG            | 118       | (80)       |
|                              | korB-Fz        | TCGTGGATAACGACTACAAACG           |           |            |
|                              | korB-R         | TTCTTCTTGCCCTTCGCCAG             |           |            |
|                              | korB-Rge       | TTYTTCTTGCCCTTCGCCAG             |           |            |
|                              | KorB-Rd        | TTCTTGACTCCCTTCGCCAG             |           |            |
| <i>strA</i>                  | q-strA-Fw      | TCAATCCCGACTTCTTACCG             | 521       | (79)       |
|                              | q-strA-Rv      | CACCATGGCAAACAACCATA             |           |            |
|                              | q-strA-P       | TGCTCGACCAAGAGCGGC               |           |            |
| <i>int2</i>                  | int2-LC2       | TGCTTTTCCACCCTTACC               | 195       | (78)       |
|                              | int2-LC3       | GACGGCTACCCTCTGTTATCTC           |           |            |
|                              | int2-P         | TGGATACTCGCAACCAAGTTATTTTTACGCTG |           |            |
| <i>tet(Q)</i>                | q-tetQ-Fw      | AGTGCTGAACCTTGTTTGATTC           | 69        | (81)       |
|                              | q-tetQ-Rv      | GGCCGGACGGAGGATTT                |           |            |
|                              | q-tetQ-P       | TCGCATCAGCATCCCGCTC              |           |            |
|                              |                | CACGGTATGTGGGARATGCC             |           |            |
| <i>IncF (tral)</i>           | 682_F          | TCCGGCGGCAGYATVCCRAC             |           | This study |
|                              | 1073_R         | CAGCAGGCGGTGRCRCAGGC             |           |            |
|                              | 973_P          |                                  |           |            |
| <i>Inc11 (tral)</i>          | Inc11_tral_Fwd | TTCTTCTTCCCCTACCATC              | 118       | This study |
|                              | Inc11_tral_Rev | CATTTTCCAGCGTGTTTC               |           |            |
|                              | Inc11_tral_TP  | CGGCTTTTCACTTCGTGGTT             |           |            |
| <i>Inc12 (tral)</i>          | Inc12_tral_Fwd | CAAGAACAGAAACAGGCA               | 291       | This study |
|                              | Inc12_tral_Rev | TCCCGCAGATAACAGATA               |           |            |
|                              | Inc12_tral_TP  | CCAAACCAACCACAACCA               |           |            |
| <i>merRTΔP</i>               | merRT-P        | GGGAGATCTAAAGCACGCTAAGGCRTA      | 1000      | (82)       |
|                              | merRT-P-P      | GGGGAATTCTTGACWGTGATCGGGCA       |           |            |
| <i>bla<sub>CTX-M-1</sub></i> | CTX-M-F        | TCTTCCAGAATAAGGAATCCC            | 908       | (83)       |
|                              | CTX-M-R        | CCGTTTCCGCTATTACAAAC             |           |            |
| <i>bla<sub>TEM</sub></i>     | TEM-F          | TCCGCTCATGAGACAATAACC            | 930       | (83)       |
|                              | TEM-R          | TTGGTCTGACAGTTACCAATGC           |           |            |
| <i>bla<sub>SHV</sub></i>     | SHV-F          | TTATCTCCCTGTTAGCCACC             | 796       | (83)       |
|                              | SHV-R          | GATTTGCTGATTTGCTCGG              |           |            |
| <i>IS1071</i>                | IS-F           | GCTTGGTCACTTCTGGGTCTTC           | 180       | (84)       |
|                              | IS-R           | CTATGCCCGTCTATCGTTACCC           |           |            |
| <i>IncN</i>                  | rep-1          | AGTTCACCACCTACTCGCTCCG           | 165       | (85)       |
|                              | rep-2          | CAAGTTCTTCTGTTGGGATTCCG          |           |            |
| <i>qnrA</i>                  | qnrAf-RT       | ATTTCTCACGCCAGGATTTG             | 529       | (86)       |
|                              | qnrAr-RT       | GCAGATCGGCATAGCTGAAG             |           |            |

1005



1006 **TABLE 4 (continued)**

| Gene target | Primer    | Primer and Probe (5'-3' ) | size (bp) | Reference |
|-------------|-----------|---------------------------|-----------|-----------|
| <i>qnrB</i> | qnrBmF    | GGMATHGAAATTCGCCACTG      | 429       | (86)      |
|             | qnrBmR    | TTYGCBGYCGCCAGTCGAA       |           |           |
| <i>qnrS</i> | qnrSrtF11 | GACGTGCTAACTTGC GTGAT     | 393       | (86)      |
|             | qnrSrtR11 | TGGCATTGTTGGAAACTTG       |           |           |

1007  
1008  
1009  
1010  
1011  
1012  
1013  
1014  
1015  
1016  
1017  
1018  
1019  
1020  
1021  
1022  
1023  
1024  
1025  
1026  
1027  
1028  
1029  
1030  
1031  
1032  
1033  
1034  
1035  
1036  
1037  
1038  
1039  
1040  
1041  
1042  
1043  
1044  
1045  
1046  
1047  
1048  
1049  
1050

1051 **Figure legends**

1052 **Figure 1.** Flow diagram of the experimental set-up of this study to employ culture-  
1053 dependent and -independent approaches to characterize the transferable resistome of  
1054 bacteria associated with produce.

1055

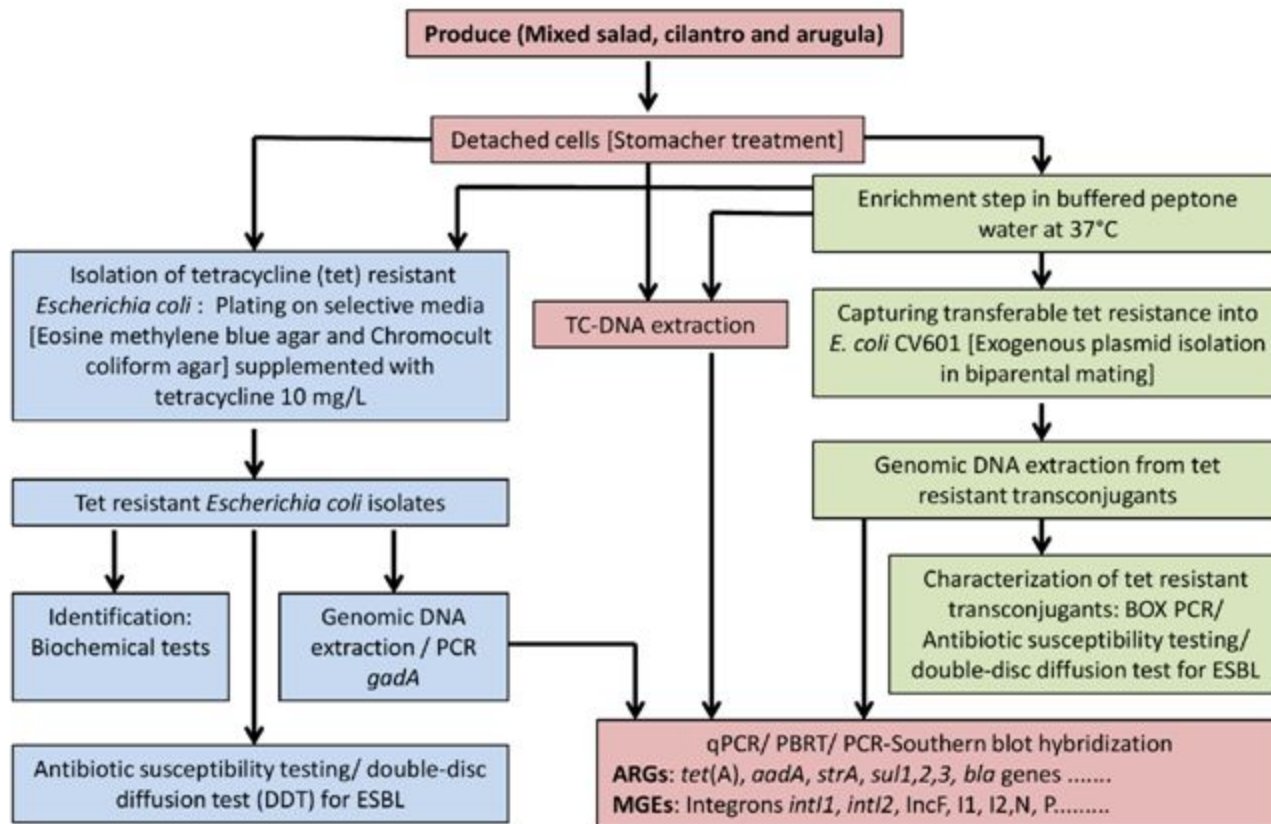

Source: https://www.biorxiv.org/content/10.1101/350629v1.full.pdf
